# Supplementary material for: Chromosome Fragile Sites in Arabidopsis Harbor Matrix Attachment Regions That May Be Associated with Ancestral Chromosome Rearrangement Events
Source: PubMed Central journal article supplement (PMC3527283; doi:10.1371/journal.pgen.1003136), 2012-12-20
Supplement: pgen.1003136.s001.pdf [file pgen.1003136.s001.pdf]

Figure S1: Motifs identified by Meme Analysis

Motif 1:

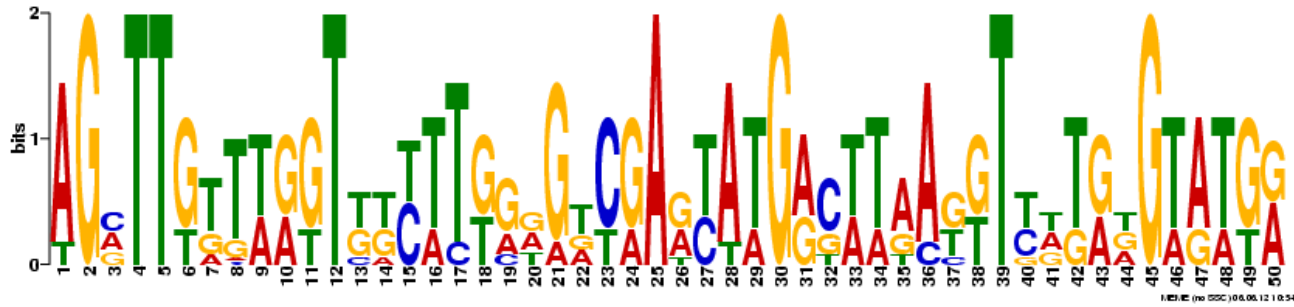

| Name  | Strand | Start | p-value  | Sites <a href="#">?</a>                                                  |
|-------|--------|-------|----------|--------------------------------------------------------------------------|
| bp2N  | +      | 249   | 2.79e-22 | AGCAAGAAGA AGCTTGGTTAGTGTGGAGTCGAATATGACTTGATGTCATGTGTATGA TTGAGTATAA    |
| bp2N  | +      | 81    | 4.79e-21 | AGCTAGAAGA AGCTTGGNTAGTGTGGAGTCGAATATGACTTGATGTCATGTGTATGA TTGAGTATAA    |
| bp11N | +      | 288   | 2.05e-19 | AGATTAAGGC AGGTTGTTAGGTTGCATTGTGACGAGTATGGCTAAAGTTTTTAAGTAAGG GTCTATCATC |
| bp2N  | +      | 426   | 2.27e-19 | AGCAAGAAGA AGCTTGATTAGTGTGGAGTTGAATATGACTTTATGTCATGTGTATGA TTGAGTATAA    |
| bp5N  | -      | 309   | 2.80e-19 | AGATTAAGGC AGGTTGTTAGGTTGCATTGTGACGAGTATGGCTAACGGTTTTAAGTAAGG GTCTATCACT |
| bp11N | +      | 446   | 1.90e-17 | CTTCAACTTA AGATTTTTTGTGGCTTGAGGGCAAGCAAGAGATAAGTTTGGGGGAGTTG ATAACACAGT  |
| bp5N  | -      | 151   | 8.00e-16 | TTTCAACTTA AGATTTTTTGTGACTCGAGGGCAATCAAGAGATAAGTTTGGGGGAGTTG ATAACACTGT  |
| bp5N  | -      | 1012  | 2.54e-15 | CATTTGTGTG TGATTGTGAGGCTTTTTTCGATTGAGCTTGGTATAACGTGTTAGGTATGA GCCGACAAGA |

Motif 2:

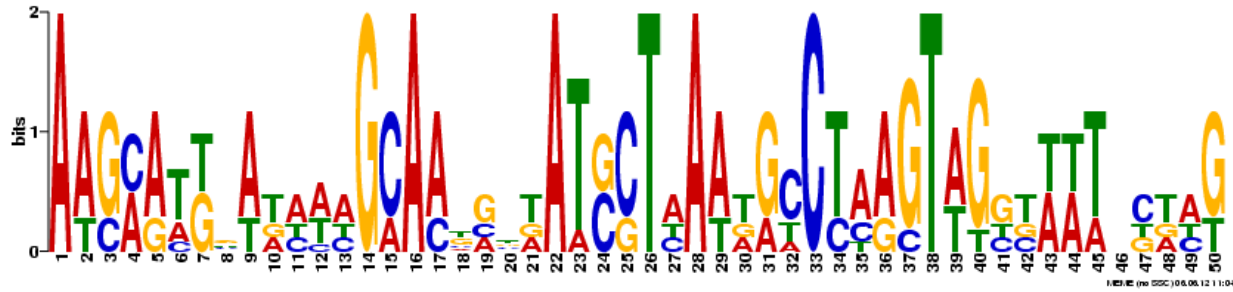

| Name  | Strand | Start | p-value  | Sites                                                                    |
|-------|--------|-------|----------|--------------------------------------------------------------------------|
| bp2N  | +      | 484   | 2.34e-18 | GATTGAGTAT AAGAA TTTAAATCGCAATCTTATCCTAAAAGCCTAAGTAGTGTTCCTTG TTAGAATATA |
| bp11N | -      | 355   | 5.51e-18 | TCAAAAACCG AAGCATGCATATAGAACGGGTATGCTCAATGTCCTGGTAGCTAATTCTAG GTTGCAAGAT |
| bp5N  | +      | 242   | 7.39e-17 | TCAAAAATCG AAGCATGCATATAGAACAGGTAAGCTCAATGTCCAGGTAGCTAATTCTAG GTTGCAAAGT |
| bp2N  | +      | 139   | 1.31e-16 | GATTGAGTAT AAGAACTTAAACCGCAACCATATCCTAAAAGCCTAAGTAGTGTTCCTTG TTAGAATATA  |
| bp11N | -      | 180   | 2.67e-16 | ATTAAGCACG AACAGTGGATCAAGCAATGCAATGGTTATGACCTCAGTTGGTTTTGGCT TAGGCTAAGA  |
| bp11N | -      | 589   | 1.05e-15 | ACACCAAAAG ATGCAATATGTATGCAAGATGATCCTAAATGCCTAAGTTGGCAAAATAAG CTAAATGTGA |
| bp5N  | +      | 9     | 1.42e-15 | CACCAAAAA ATGCAATGTGTATGCAAGATGATCCTAAATGCCTAAGTATGCAAAATAAG CTAAATGGT   |
| bp5N  | +      | 380   | 8.68e-15 | TTTAAGCACG AACAGTGGATCAAGCAATGCAATGGTTATGAACTCACTTGGTTTTGGCT TAGGCTAAGA  |

Motif 3:

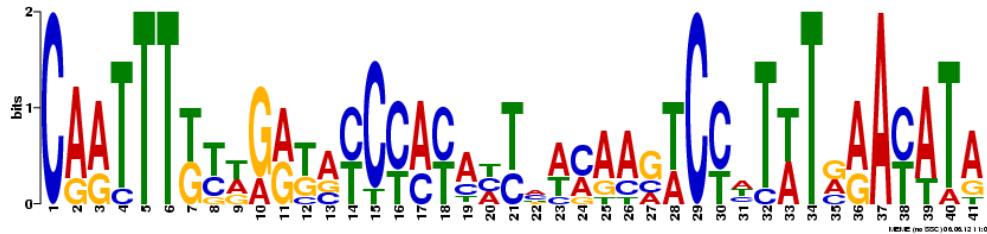

| Name  | Strand | Start | p-value  | Sites <a href="#">?</a>                                           |
|-------|--------|-------|----------|-------------------------------------------------------------------|
| bp1N  | +      | 81    | 3.95e-16 | AAATAACAAA CAATTTTTTGGTGTCCATAAATAACAAGTCCWTTTAAATATA TCCATTTCGGA |
| bp1N  | +      | 280   | 6.85e-16 | AATCATCAAA CAATTTTTTGGCATCCATAAATAACAAGTCCATTTAAATATA TCCATTTCAGA |
| bp1N  | -      | 223   | 1.69e-15 | GATTTTCTTT CAGCTTGCAGAGACCTCCACCXTCAAGACCTTATGGACATG GAACTCTGGT   |
| bp1N  | +      | 481   | 2.74e-15 | AATCAACAAA CAATTTGTTGGTGTCCATAAATAACAAGTCCATTTAAATATA TCAATTTCGGA |
| bp1N  | -      | 422   | 4.82e-14 | TTTTTTTTTTT CAATTTGCAGAGACTTCCACCCTCAAAAACCTATGGATATG GAACTTTGGT  |
| bp1N  | -      | 23    | 1.20e-13 | TTTTTTTTTTA CAGTTTGCAGAGACCTCCXCCTCGGAGACTTTATGGACATA GAAATTATAC  |
| bp5N  | -      | 201   | 1.30e-13 | ATGCATGCTT CGATTTTTGAATCCCCACCTTCAAACCTCTCTTTCAACTTA AGATTTTTTG   |
| bp11N | +      | 405   | 4.66e-13 | ATGCATGCTT CGGTTTTTGAATCCCCACCTTCAAACCTCTCCTTCAACTTA AGATTTTTTG   |
| bp1S  | -      | 233   | 4.11e-12 | CTTCTATTTT CAATTTTGTGGTATCCATTTTGTATTGTCCATATGAACAAT GTACTTTTGC   |

Motif 4:

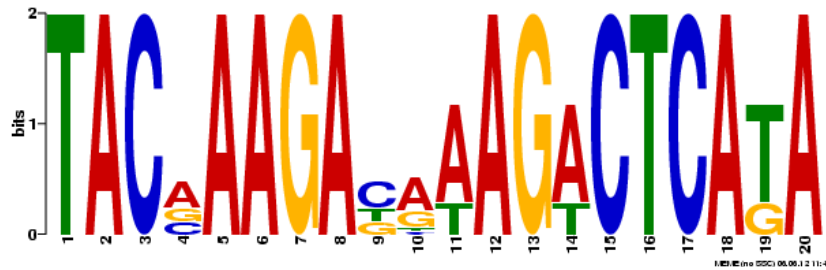

| Name | Strand | Start | p-value  | Sites <a href="#">?</a>                    |
|------|--------|-------|----------|--------------------------------------------|
| bp2N | +      | 542   | 1.10e-11 | TGTTAGAATA TACGAAGACAAAGACTCATA TGGACTTCGG |
| bp2N | +      | 18    | 3.42e-11 | GTTAGAAGGC TACAAAGACNAAGACTCATA TGGACCNTTG |
| bp2N | +      | 364   | 7.62e-11 | CGTTAGAAGA TACAAAGATAAAGACTCATA TGGACTTCGG |
| bp2S | +      | 1076  | 3.89e-10 | GAGGGAATCA TACCAAGAGGTAGTCTCAGA CCAGCATTAT |

Motif 5:

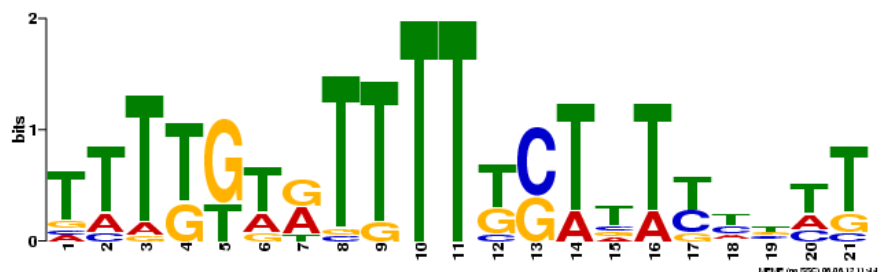

| Name  | Strand | Start | p-value  | Sites                                         |
|-------|--------|-------|----------|-----------------------------------------------|
| bp1S  | -      | 71    | 1.44e-08 | AATTTAATAA TTTTGGGTTTTCCTTATCCTT ATAAATCATA   |
| bp1S  | -      | 187   | 3.26e-08 | TGGTGACCAT TTTTGTATGTTGGTTTCTCT TTTGTACCCA    |
| bp1N  | -      | 877   | 1.03e-07 | ATTTTGATGG TATGGAATTTTTCTTTCACCTT AGGGGATTGG  |
| bp1S  | +      | 1294  | 1.53e-07 | AATCAAATA TTTTGTATTTTTCAATTTGTT AGAGATAAAA    |
| bp11S | +      | 1666  | 1.74e-07 | TTGTGCTCTG TTTTGTGGTTTTGTTCATTT TTAGCTTAAT    |
| bp3N  | -      | 609   | 3.97e-07 | TTCCATCTTT GCTTGTGTTTTGCTTTTCTCC AGCCTAGATA   |
| bp3N  | -      | 249   | 3.97e-07 | ACCTTGTCGC TTTTGTGGTTTTTCATTCACCTT GGGCCTTAAA |
| bp5N  | -      | 1712  | 8.31e-07 | ATACCATTGG CTTTTTATTTTTCTTTGTGTG TTTTGTGTTT   |
| bp3S  | +      | 87    | 8.31e-07 | CAATAGAAA TTTTGTAGTTTTGGATACCCG GGTTTACCCG    |
| bp5N  | +      | 1558  | 1.01e-06 | TCAAATTTT TATGGTTTTTTTCTATGCCTT AGATTGATGC    |
| bp5N  | -      | 1691  | 1.11e-06 | TCTTTGTGTG TTTTGTGTTTTGGTCTTGAAT TTTTCCTCAG   |
| bp11S | -      | 976   | 1.23e-06 | TGATATATGA TATTGTATTTTCTGTTTGAG TATATTTTCC    |
| bp11S | +      | 1168  | 2.10e-06 | ATATGATTAT TTTGTTGTTTTGTGATATAT ATTGTATTTA    |
| bp5S  | +      | 1345  | 2.10e-06 | TTCTCTTCTT TTATGTACTTTGGTTTTTTGTT ATTCGAAAGA  |
| bp5S  | -      | 1196  | 2.28e-06 | ATATTAAGAA GTTGGGGTTTTCTCATTGAT CACCAAAATG    |
| bp3S  | +      | 1255  | 2.28e-06 | AAATTTCAAT TTGGTAAATTTTTGTTTTTGT TGAATTTACA   |
| bp11N | +      | 1085  | 2.70e-06 | TAGCTTTTAT CCTTTAGTTTTCTTTGTGTT CTTGAATCTT    |
| bp1S  | +      | 1498  | 3.17e-06 | TCCATCCAAA TATTTTGTTTTTGTCAATCT TAATATGTAA    |
| bp11S | +      | 1746  | 3.43e-06 | TGCATAGAAG GTATGAATTTTTCTTTTCTAG ATATATAAGG   |
| bp2S  | -      | 365   | 3.71e-06 | TCCGTCGTGG ATTGGTATGTTTCAGTCTCT CTAATATATA    |
| bp1S  | -      | 1351  | 3.71e-06 | TGTTAAAGTA TTTTGTATTTTTCAATTAATG GCATTCGATT   |
| bp5S  | -      | 1239  | 4.99e-06 | ATTCTAAGGG TATGTTTTGTTGGTTTCTAT TTATATCTTT    |
| bp1N  | -      | 638   | 4.99e-06 | TGGCGGCTTG ATTTGATTTTTGCTCTCTCTC ATGTGTCAA    |
