# Supplementary material for: Chromosome Fragile Sites in Arabidopsis Harbor Matrix Attachment Regions That May Be Associated with Ancestral Chromosome Rearrangement Events
Source: PubMed Central journal article supplement (PMC3527283; doi:10.1371/journal.pgen.1003136), 2012-12-20

Figure S3: *bp5N*, *bp2S*, *bp1S*, *bp11S*, *bp5S* and *bp3S* (part1)

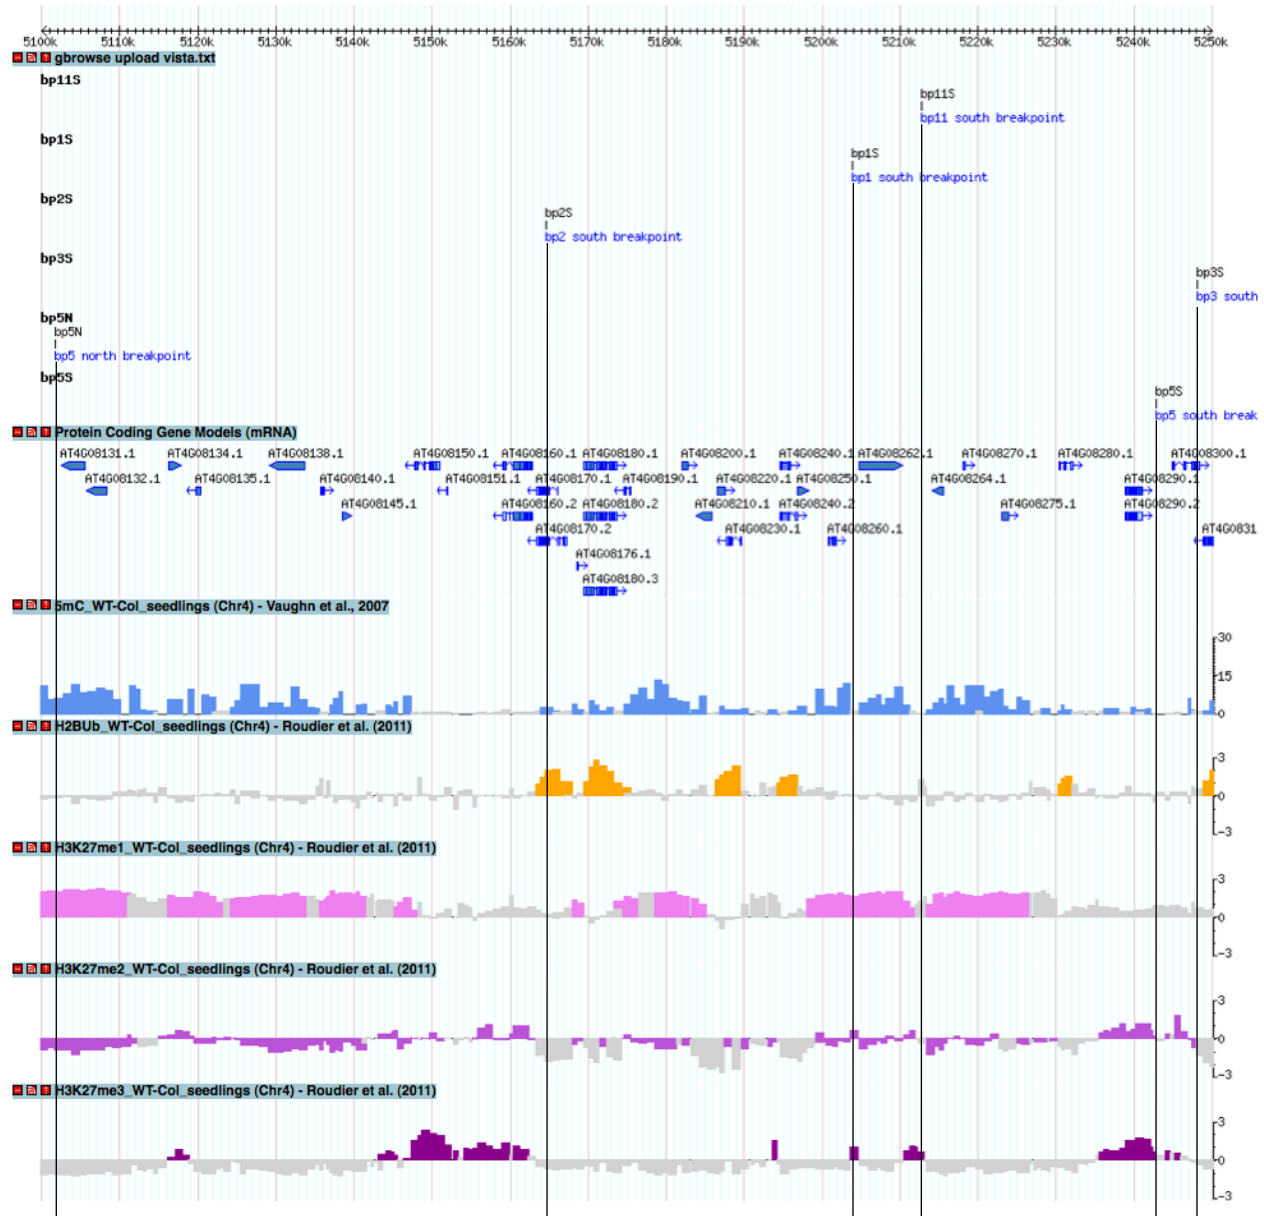

# bp5N, bp2S, bp1S, bp11S, bp5S and bp3S (part 2)

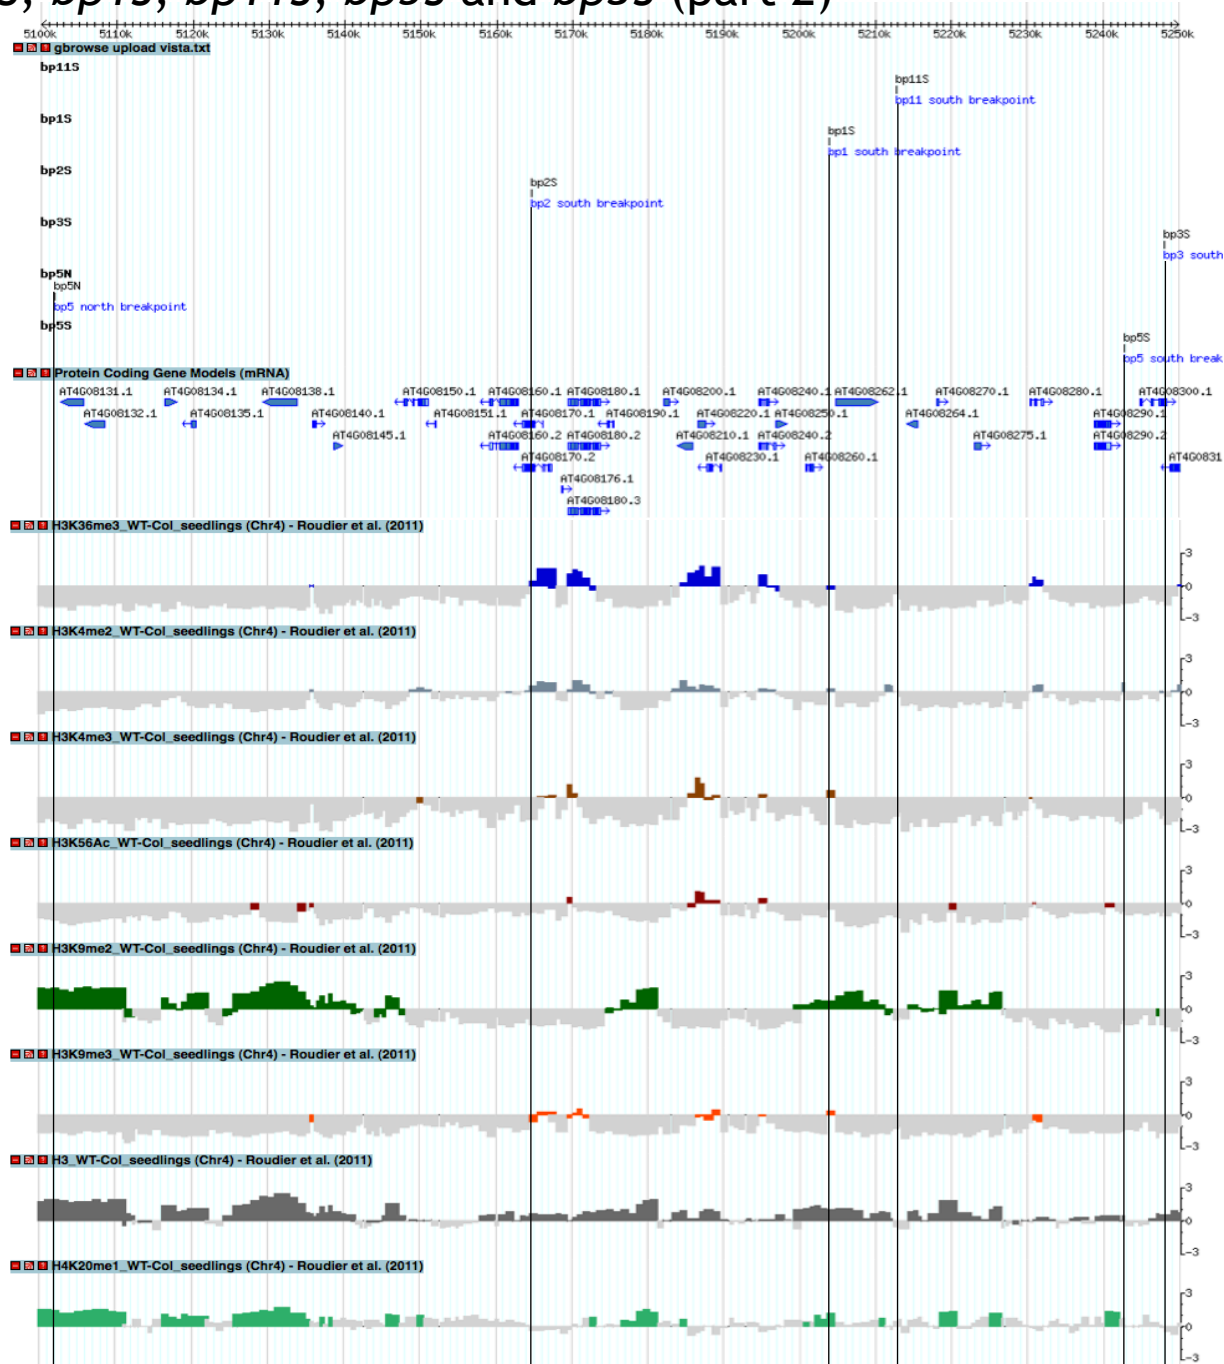

# bp11 north (part 1)

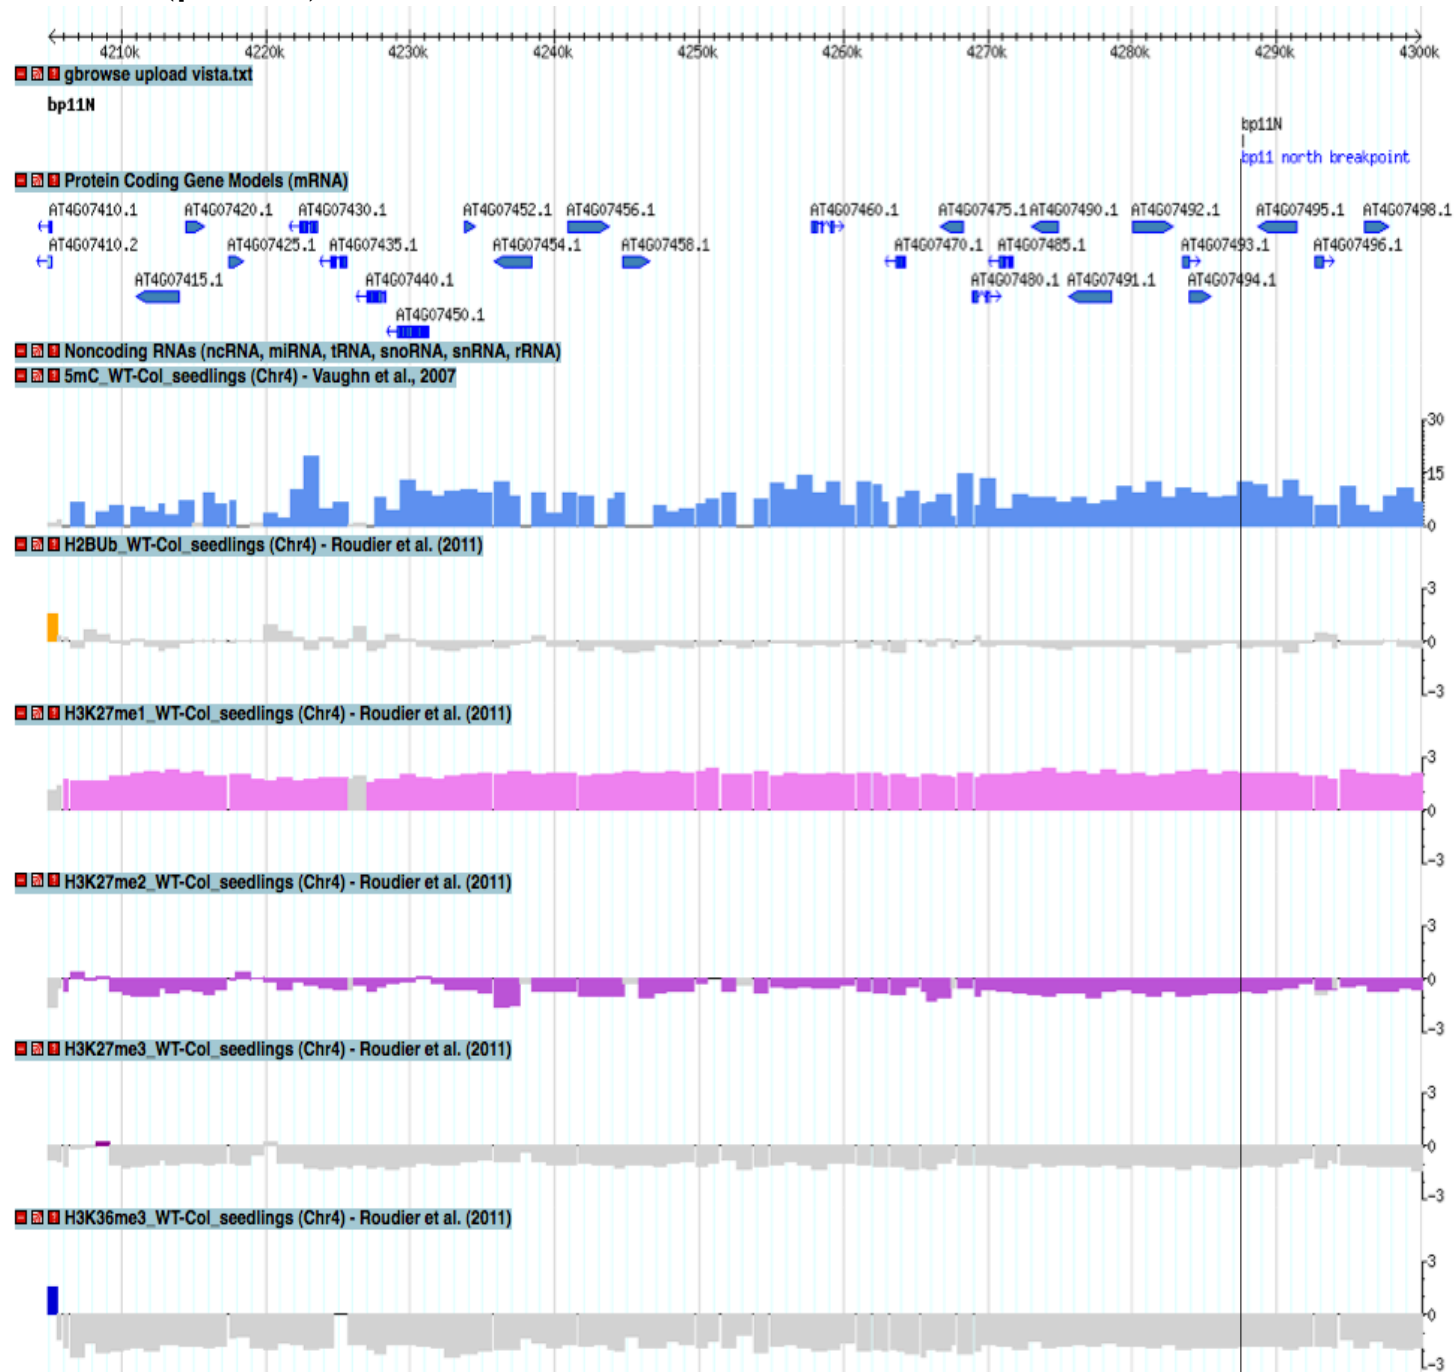

# bp11 north (part 2)

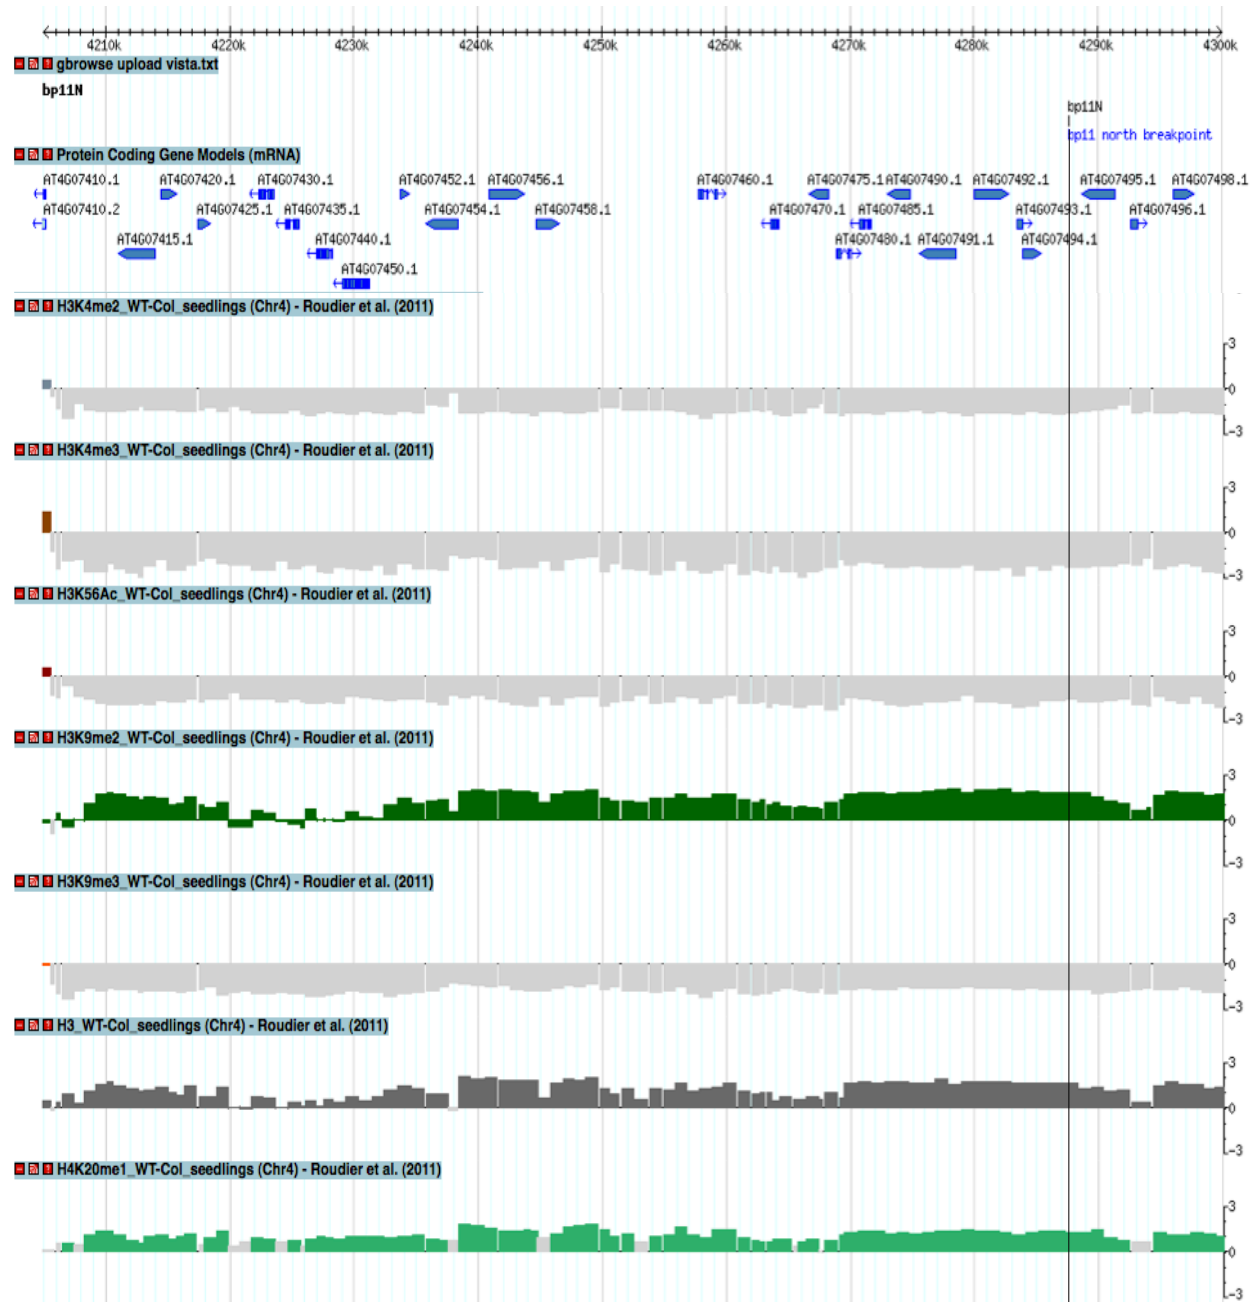

# bp3 north (part 1)

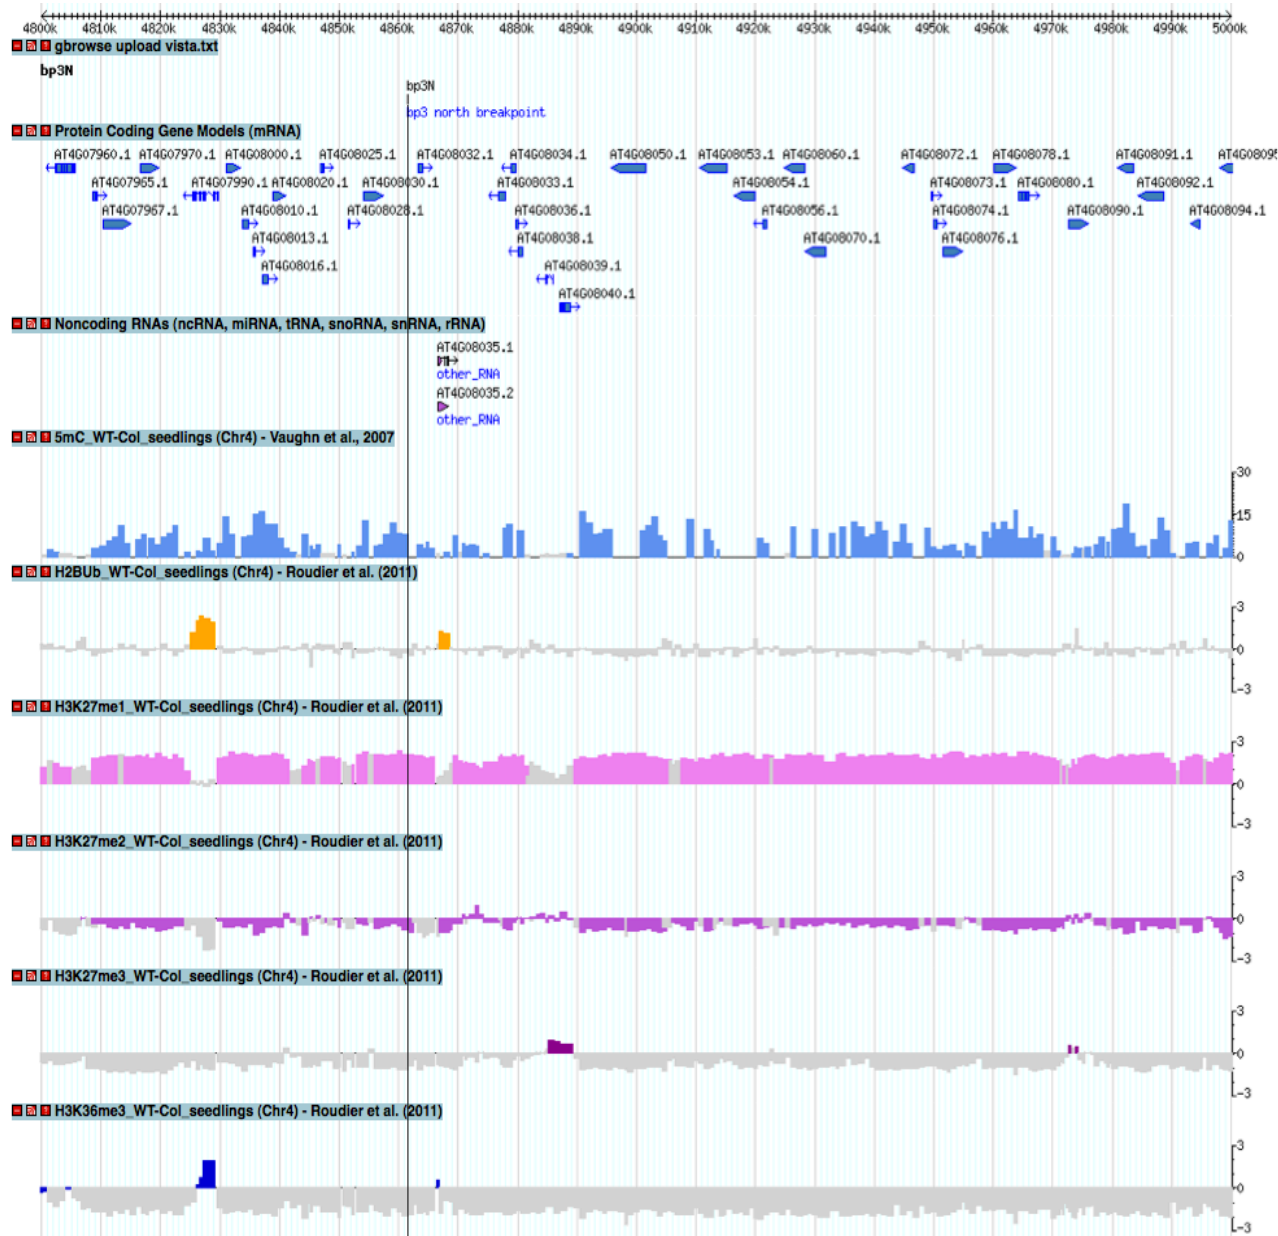

# bp3 north (part 2)

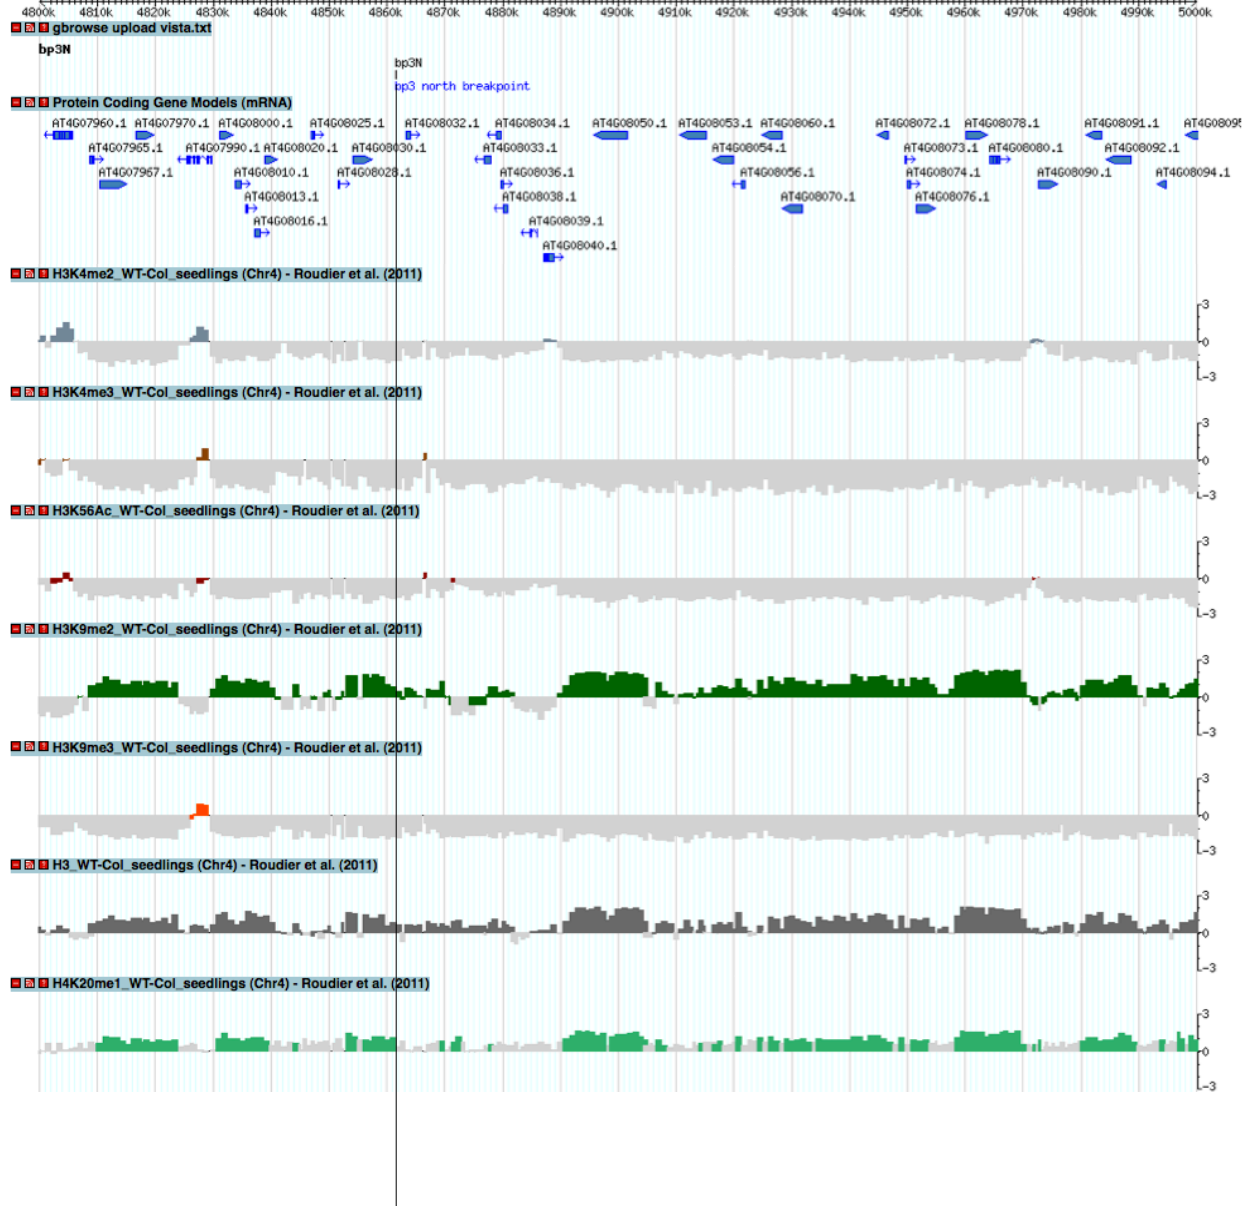

Supplement: pgen.1003136.s003.pdf [file pgen.1003136.s003.pdf]
