# Supplementary material for: Chromosome Fragile Sites in Arabidopsis Harbor Matrix Attachment Regions That May Be Associated with Ancestral Chromosome Rearrangement Events
Source: PubMed Central journal article supplement (PMC3527283; doi:10.1371/journal.pgen.1003136), 2012-12-20
Supplement: pgen.1003136.s005.pdf [file pgen.1003136.s005.pdf]

Table S1: Summary of characterized *bp* alleles

| Allele       | Background | Mutagen    | Mutation     | Reference                     |
|--------------|------------|------------|--------------|-------------------------------|
| <i>bp-1</i>  | Ler        | EMS        | Deletion     | Koornneef et al., 1983        |
| <i>bp-2</i>  | Ler        | FN         | Deletion     | Douglas et al., 2002          |
| <i>bp-2#</i> | RLD/Ler    | T-DNA      | Point mutant | Venglat et al., 2002          |
| <i>bp-3</i>  | Ler        | FN         | Deletion     | Douglas et al., 2002          |
| <i>bp-4</i>  | Ler        | EMS        | Point mutant | Douglas et al., 2002          |
| <i>bp-5</i>  | Col        | T-DNA      | Deletion     | Douglas et al., 2002          |
| <i>bp-6</i>  | Ler        | EMS        | Point mutant | Byrne et al., 2002            |
| <i>bp-7</i>  | Ler        | EMS        | Point mutant | Byrne et al., 2002            |
| <i>bp-8</i>  | Ler        | EMS        | Point mutant | Byrne et al., 2002            |
| <i>bp-9</i>  | Col        | transposon | Insertion    | Kanrar et al., 2006           |
| <i>bp-10</i> | Col        | EMS        | Point mutant | Ikezak et al., 2010           |
| <i>bp-11</i> | Col        | X-rays     | Deletion     | Redei, unpublished; this work |

#the *bp-2* mutant reported by Venglat was isolated concomitantly with the *bp-2* mutant we discovered, hence there are two known *bp-2* mutants.

References:

Byrne ME, Simorowski J, Martienssen RA (2002) ASYMMETRIC LEAVES1 reveals knox gene redundancy. *Development* 129, 1957-1965.

Douglas SJ, Chuck G, Dengler RE, Pelecanda L, Riggs CD (2002) KNAT1 and ERECTA regulate inflorescence architecture in Arabidopsis. *Plant Cell* 14: 547-558.

Ikezaki M, Kojima M, Sakakibara H, Kojima S, Ueno Y, Machida C, Machida Y (2010) Genetic networks regulated by ASYMMETRIC LEAVES1 (AS1) and AS2 in leaf development in Arabidopsis thaliana: KNOX genes control five morphological events. *Plant J* 61, 70–82

Kanrar S, Onguka O, Smith HMS (2006) Arabidopsis inflorescence architecture requires the activities of KNOX-BELL homeodomain heterodimers. *Planta* 224: 1163-1173.

Koornneef M, Vaneden J, Hanhart CJ, Stam P, Braaksma FJ, et al. (1983) Linkage map of *Arabidopsis thaliana*. *J Hered* 74: 265-272.

Venglat SP, Dumonceaux T, Rozwadowski K, Parnell L, Babic V, et al. (2002) The homeobox gene BREVIPEDICELLUS is a key regulator of inflorescence architecture in Arabidopsis. *Proc Natl Acad Sci USA* 99: 4730-4735.
