# Supplementary material for: Chromosome Fragile Sites in Arabidopsis Harbor Matrix Attachment Regions That May Be Associated with Ancestral Chromosome Rearrangement Events
Source: PubMed Central journal article supplement (PMC3527283; doi:10.1371/journal.pgen.1003136), 2012-12-20
Supplement: pgen.1003136.s006.pdf [file pgen.1003136.s006.pdf]

Table S2: Primers used to localize deletions\*

| Name         | Location         | Sequence                        | Product size            | C | L | 1 | 2 | 3 | 5 | 11 |
|--------------|------------------|---------------------------------|-------------------------|---|---|---|---|---|---|----|
| F15N16 For   | F15N16<br>83.3kb | CATGACCGAGAAGCCAAAGAGGAATCTC    | 0.35                    | + | + | + | + | + | + | +  |
| F15N16 Back  |                  | CCTATTCTCTAACCGCAACTCTGCGTGC    |                         |   |   |   |   |   |   |    |
| F14G16 For   | F14G16<br>47.5kb | ACAAACCGATCAGCATTCAAG           | 0.25 (Col)<br>0.2 (Ler) | + | + | + | + | + | + | +  |
| F14G16 Back  |                  | GCCTTTGTACGATTCAAC              |                         |   |   |   |   |   |   |    |
| F28D6 For    | F28D6<br>51.7kb  | TGAAATGAACCAGTGCTGCTG           | 1.2                     | + | + | + | + | + | + | +  |
| F28D6 Back   |                  | CTGTACCAATTAGTCGAGAAGGTC        |                         |   |   |   |   |   |   |    |
| T3E15-2FOR   | T3E15<br>49.4kb  | GTAGCGTTATCCATGTGATAAGAGCGTCC   | 1.4 (Col)<br>0.92 (Ler) | + | + | + | + | + | + | -  |
| T3E15-2BACK  |                  | CCTTTCCAATTTTGGCATGGTGAGAATTCAG |                         |   |   |   |   |   |   |    |
| T3E15 For    | T3E15<br>116.9kb | GCCCATCAGTTTCAAGCCCAAGAAGG      | 0.77                    | + | - | - | - | - | + | -  |
| T3E15 back   |                  | CGCTACCTCTTCAAGTTCAACCATACGGAG  |                         |   |   |   |   |   |   |    |
| F5K24 For    | F5K24<br>38.2kb  | CAGCGTCTAGGTCACCCATCTATGTCAAGG  | 1.75                    | + | - | - | - | - | + | -  |
| F5K24 Back   |                  | CGGAGAACTTGTGAAACCATTGACGTGAAG  |                         |   |   |   |   |   |   |    |
| F1K3 For     | F1K3<br>23.8kb   | GGGTACAAACATAGTCATTGGCAGG       | 1.7                     | + | + | - | - | + | + | -  |
| F1K3 Back    |                  | AGACATTGAAATCTCCTCCTCGG         |                         |   |   |   |   |   |   |    |
| F1K3-46 For  | F1K3<br>47.4kb   | GGTCCTTTGGTTTCTATGCGAAG         | 2.5                     | + | + | - | - | + | + | -  |
| F1K3-47 Back |                  | CTGAAAATTGTTCGTCGTCGGTAC        |                         |   |   |   |   |   |   |    |
| 44.7 For     | T17A2<br>1.4kb   | TTCCTCAACAGGGCTCACATTC          | 0.91                    | + | + | - | - | - | + | -  |
| 45.6 Back    |                  | GCAGGGATAAGAAAGGCATCTCC         |                         |   |   |   |   |   |   |    |
| 78.7 For     | T13D4<br>32.1kb  | CTGAAGCCCGAACCTAATGATG          | 0.74<br><in Ler?        | + | + | - | + | - | + | -  |
| 79.4 Back    |                  | TGGTGGAGAATAGTTGCTGCG           |                         |   |   |   |   |   |   |    |
| 76 For       | F9M13<br>24.3kb  | TGTGGATTTACTGGAACACTCCG         | 0.97 (Col)<br>Ler <     | + | + | - | - | - | + | -  |
| 77 Back      |                  | GCTCTGCCATCTTTGACGAAG           |                         |   |   |   |   |   |   |    |
| North 8 For  | F9M13<br>61.9kb  | ACTCGGACATAGGCACTGTGACTC        | 0.97                    | + | + | - | - | - | - | -  |
| North 8 Back |                  | AACTCAGGAATGGAGAAGATGCG         |                         |   |   |   |   |   |   |    |
| North 5 For  | F9M13<br>82.9kb  | ACCTTGGTTGCTTGGATGCC            | 2.0                     | + | + | - | - | - | - | -  |
| North 5 Back |                  | TGTCGCCGTTGTTAGTGTCTGAG         |                         |   |   |   |   |   |   |    |
| BP GENE      | F9M13 88kb       |                                 |                         |   |   |   |   |   |   |    |
| bp2 FOR      | T12G13<br>2.7kb  | GAACATAAGGAGGGAATCATACCAAGAGG   | 2.3                     | + | + | - | + | - | - | -  |
| bp2 BACK     |                  | GATGAAGCTAACGGACAACGAAGAGAT     |                         |   |   |   |   |   |   |    |
| North 1 For  | T12G13<br>11.3kb | GAGTCTTACCGATACAAAGGAGG         | 1.6                     | + | + | - | + | - | - | -  |
| North 1 Back |                  | AACTATCTGAACGCTTGTCCC           |                         |   |   |   |   |   |   |    |
| T12G13 For   | T12G13<br>20.5kb | GCACAATCGAGCAAGGTATGATG         | 1.85                    | + | + | - | + | - | - | -  |
| T12G13 Back  |                  | ACGAGTCGAAGAAGCGTTTCGG          |                         |   |   |   |   |   |   |    |
| T1223 For    | T12G13<br>23.8kb | CGCTTAAAGGCTTGTACTTTCCCAC       | 2.25                    | + | + | - | + | - | - | -  |
| T1223 Back   |                  | TGGCTAATCCTTGTGTGTGGAC          |                         |   |   |   |   |   |   |    |

|                 |                  |                                   |      |   |   |   |   |   |   |   |
|-----------------|------------------|-----------------------------------|------|---|---|---|---|---|---|---|
| South 3.25 For  | T12G13<br>29kb   | CCTCTCGTTTTTACGCCATTAGTCG         | 0.84 | + | + | - | + | - | - | - |
| South 3.25 Back |                  | TGAAGACGGATCTTGGATACTTAGGC        |      |   |   |   |   |   |   |   |
| South 3.75 For  | T12G13<br>38.5kb | TTCCGAGATTTGCTTCGTCAATATTTTAAAGGG | 0.57 | + | + | - | + | - | - | - |
| South 3.75 Back |                  | TAATCCAATCCCTAAATCCTAATTTGAGCTGT  |      |   |   |   |   |   |   |   |
| South 4 For     | T12G13<br>42.6kb | TGAACTCCGTTGAGATAATGGGTG          | 0.85 | + | + | + | + | - | - | - |
| South 4 Back    |                  | GGGACAGTCTTAGGCAATGGTGAC          |      |   |   |   |   |   |   |   |
| South 4.5 For   | T12G13<br>47.2kb | GATCATCCCCGCTTATGAAAACGACATTC     | 0.62 | + | + | + | + | - | - | - |
| South 4.5 Back  |                  | TGTCATTCCCTTTGCCCGCACAATAGC       |      |   |   |   |   |   |   |   |
| bp10 For        | T12G13<br>51.8kb | CGTTGGATCTCATAGATAGTAGAGTTATG     | 0.57 | + | + | + | + | - | - | + |
| bp10 Back       |                  | TTGATAGATGTGCTTTTAAAGTGAGTATCT    |      |   |   |   |   |   |   |   |
| South 4.75 For  | T12G13<br>60.6kb | GCATCGCTTTTTACCATTGCTAAG          | 0.96 | + | + | + | + | - | - | + |
| South 4.75 Back |                  | GCCTGCTATTTTCAATTTATCAGTCTCG      |      |   |   |   |   |   |   |   |
| South 6 For     | T12G13<br>77.2kb | TGTATCGTAATCTTGTGGCTGCTC          | 0.7  | + | + | + | + | - | - | + |
| South 6 Back    |                  | ACGGTAAAGGAATAAGCGGACC            |      |   |   |   |   |   |   |   |
| South 6.25 For  | T12G13<br>80.8kb | CCTCTGGATAACTGAAGCAGGCA           | 1.0  | + | + | + | + | - | + | + |
| South 6.25 Back |                  | GTGTCTCCTACACTCATGTTC             |      |   |   |   |   |   |   |   |
| 08310 For       | T12G13<br>88.7kb | GCTGAGCAAACAAAGGATGAGGAC          | 1.5  | + | + | + | + | + | + | + |
| 08310 Back      |                  | CTTCGTTTTGACTTCCCTCTCCG           |      |   |   |   |   |   |   |   |
| South 8 For     | T28D6<br>5.4kb   | TTGTAGGGGCAGAATCGCAAGC            | 0.8  | + | + | + | + | + | + | + |
| South 8 back    |                  | GCAAGTCAATCAACGAATCAGGC           |      |   |   |   |   |   |   |   |
| South 9 For     | T28D6<br>13.2kb  | GCTGGAGAAAAGCGTAAGGAGGT           | 0.9  | + | + | + | + | + | + | + |
| South 9 back    |                  | AGGGCAATGAGATGTGTTGGATAG          |      |   |   |   |   |   |   |   |

\*PCR conducted on genomic DNA from Columbia (C), Landsberg *erecta* (L), and the *bp* mutant alleles, *bp-1*, *bp-2*, *bp-3*, *bp-5* and *bp-11*. Product size is in kilobase pairs. The +/- symbols indicate the presence or absence of a pcr product with the given template/primer pair.
