# Supplementary material for: Chromosome Fragile Sites in Arabidopsis Harbor Matrix Attachment Regions That May Be Associated with Ancestral Chromosome Rearrangement Events
Source: PubMed Central journal article supplement (PMC3527283; doi:10.1371/journal.pgen.1003136), 2012-12-20
Supplement: pgen.1003136.s007.pdf [file pgen.1003136.s007.pdf]

Table S3: Inverse PCR primers\*

| Allele       | Primer          | Sequence                         |
|--------------|-----------------|----------------------------------|
| <i>bp1</i>   | S4iPCR for2     | CCTCTTTGGATACCGTGCTTGGGAG        |
|              | S4iPCR back     | CCCTGGAGTACTAGCCTCAAAGG          |
| <i>bp-2</i>  | bp2 iPCR for    | CGTCAGTCAATGCTTCAGTGTGTTGCG      |
|              | bp2 iPCR back   | CATGATATCTTGGATTACATAGAAGTCATCCC |
| <i>bp-3</i>  | XT1 iPCR for    | CTGGCTATGGGAAGCGTGTTGA           |
|              | XT1 iPCR back   | ACAACAGACTCTCCTCTCTGCCGG         |
| <i>bp-5</i>  | bp5 DB/back     | TGCCTGCTTCAGTTATCCAGAGG          |
|              | South 6.25 back | GTGTCTCCTACACTCATGTTC            |
| <i>bp-11</i> | bp11 iPCR For2  | ACGGTCAAACGGTCAAATACAAAAGGC      |
|              | bp11 iPCR Back  | GCTCACTCATAATTTGAAATTGTTGTACCACC |

\*These primers pairs are in diverging orientations, enabling amplification of recircularized genomic DNA that had been resected with the RFLP enzyme.
