# Supplementary material for: Chromosome Fragile Sites in Arabidopsis Harbor Matrix Attachment Regions That May Be Associated with Ancestral Chromosome Rearrangement Events
Source: PubMed Central journal article supplement (PMC3527283; doi:10.1371/journal.pgen.1003136), 2012-12-20
Supplement: pgen.1003136.s008.pdf [file pgen.1003136.s008.pdf]

Table S4: Phase 5 primers\*

| Allele       | Name                   | Sequence                        | Product |
|--------------|------------------------|---------------------------------|---------|
| <i>bp-3</i>  | 22144bp3.seq2          | G TTCATAAAAAGTGAGGGGGGAGTAATG   | 500bp   |
|              | BP3DB/B                | CCTTCGTTTACTTCACTGG             |         |
| <i>bp-5</i>  | 22145bp5.seq2          | AAGCACGAACAGTGGATCAAG           | 770bp   |
|              | BP5DB/B                | TGCCTGCTTCAGTTATCCAGAGG         |         |
| <i>bp-11</i> | <i>bp-11</i> phase 5   | CAGATAGGAGAGGAAGAAGCATCTACTCATC | 550bp   |
|              | <i>bp-11</i> iPCR FOR2 | GGTCAAACGGTCAAAAATACAAAAGGC     |         |

\*These primer sets amplify across the breakpoint junctions to generate PCR products of the indicated size.
