# Supplementary material for: Chromosome Fragile Sites in Arabidopsis Harbor Matrix Attachment Regions That May Be Associated with Ancestral Chromosome Rearrangement Events
Source: PubMed Central journal article supplement (PMC3527283; doi:10.1371/journal.pgen.1003136), 2012-12-20
Supplement: pgen.1003136.s009.pdf [file pgen.1003136.s009.pdf]

Table S5: Annotations of genetic elements in the 4.29Mb–5.25Mb region encompassing *bp* deletions  
Notes: North and south breakpoint locations of *bp1*, *bp2*, *bp3*, *bp5* and *bp11* are highlighted in green. Genes exhibiting evidence of expression (cDNA or EST clones) are highlighted in yellow, and GenBank accession numbers are given.

| AGI ID    | coordinate | annotation                                                                                                              | cDNAs                | ESTs                                              | T-DNAs                                           |
|-----------|------------|-------------------------------------------------------------------------------------------------------------------------|----------------------|---------------------------------------------------|--------------------------------------------------|
|           | 4287kb     | <i>bp11</i> North breakpoint                                                                                            |                      |                                                   |                                                  |
| At4g07495 | 4289kb     | transposable element gene. Mutator-like transposase family                                                              |                      |                                                   | SALK_138084                                      |
| At4g07496 | 4293kb     | transposable element gene; pseudogene,                                                                                  |                      |                                                   |                                                  |
| At4g07498 | 4297kb     | transposable element gene; gypsy-like retrotransposon family (Athila)                                                   | BE529173             |                                                   | SALK_085566                                      |
| At4g07500 | 4300kb     | transposable element gene; similar to unknown protein                                                                   |                      |                                                   |                                                  |
| At4g07502 | 4304kb     | transposable element gene; gypsy-like retrotransposon family (Athila)                                                   |                      |                                                   | GK-437B03                                        |
| At4g07504 | 4307kb     | transposable element gene; gypsy-like retrotransposon family (Athila)                                                   |                      |                                                   | SAIL_382_G07                                     |
| At4g07507 | 4310kb     | transposable element gene; pseudogene, replication protein A1 -related                                                  | BX828000<br>AK227467 | 142L2T7<br>002203_0775_2321<br>RAFL14-52-L16 (3') | GK-718H02-025281<br>FLAG_544B01                  |
| At4g07510 | 4313kb     | transposable element gene; similar to unknown protein                                                                   |                      |                                                   | WiscDsLox421D5<br>GK-296D02-015495               |
| At4g07515 | 4315kb     | Protein of unknown function (DUF784)                                                                                    | AY089062<br>BT029248 | 079126_0374_3686                                  |                                                  |
| At4g07516 | 4319kb     | Transposable element gene; non-LTR retrotransposon family (LINE)                                                        |                      |                                                   | SALK_027830.44.0<br>0.x<br>FLAG_297D04<br>1 more |
| At4g07517 | 4323kb     | transposable element gene; CACTA-like transposase family (Tnp2/En/Spm)                                                  |                      |                                                   | WiscDsLox241D07<br>GK-794F08-024939<br>2 more    |
| At4g07518 | 4327kb     | Transposable element gene; CACTA-like transposase family (PttA/En/Spm)                                                  |                      | AYAGJ24TF                                         | GK-385A06-018252<br>GK-385A06-018248             |
| At4g07519 | 4332kb     | similarity to PttA-like transposon protein                                                                              |                      | CB25933                                           |                                                  |
| At4g07521 | 4334kb     | transposable element gene; similar to nucleic acid binding / zinc ion binding [Arabidopsis thaliana] (TAIR:AT2G01050.1) |                      |                                                   | GK-489H06-019644<br>GK-489H06-019637             |

|           |        |                                                                       |                      |           |                                                                |
|-----------|--------|-----------------------------------------------------------------------|----------------------|-----------|----------------------------------------------------------------|
| At4g07522 | 4338kb | Transposable element gene; Mutator-like transposase family            |                      |           | SALK_064045.56.0<br>0.x                                        |
| At4g07523 | 4341kb | Transposable element gene; similar to unknown protein                 | BT015491<br>BT014695 |           | SALK_012605.29.9<br>9.f<br>SALK_012605.28.2<br>0.x.1<br>2 more |
| At4g07520 | 4344kb | transposable element gene; similar to unknown protein                 |                      |           | GK-889G08-<br>030257                                           |
| At4g07524 | 4346kb | Ras-related small GTP-binding family protein                          |                      |           | SALK_012605.54.7<br>0.x<br>GK-844B08-<br>025742<br>1 more      |
| At4g07525 | 4357kb | transposable element gene; gypsy-like retrotransposon family          |                      |           | GK-456C06-<br>018779                                           |
| At4g07526 | 4359kb | unknown protein                                                       |                      | AYAWY10TF | SALK_003336.47.9<br>5.x<br>SALK_003332.44.8<br>0.x             |
| At4g07528 | 4362kb | Transposable element gene; gypsy-like retrotransposon family          |                      |           | GK-048B06-<br>016082                                           |
| At4g07530 | 4367kb | Transposable element gene; similar to unknown protein                 |                      | AYAXY54TR | SALK_117836.50.7<br>0.x<br>SALK_117827.45.9<br>5.x             |
| At4g07540 | 4371kb | transposable element gene; hAT-like transposase family (hobo/Ac/Tam3) |                      |           | GK-206D05-<br>014513                                           |
| At4g07550 | 4378kb | transposable element gene; gypsy-like retrotransposon family          |                      |           |                                                                |
| At4g07560 | 4381kb | Transposable element gene; transposon protein - related               |                      |           | GK-733F02-<br>025442                                           |
| At4g07563 | 4384kb | Transposable element gene; gypsy-like retrotransposon family (Athila) |                      |           |                                                                |
| At4g07566 | 4387kb | transposable element gene; gypsy-like retrotransposon family (Athila) |                      |           |                                                                |
| At4g07570 | 4390kb | Transposable element gene; pseudogene, hypothetical protein           |                      |           | SALK_060250<br>SALK_060250.55.2<br>5.x                         |

|           |        |                                                                                         |  |  |                                                              |
|-----------|--------|-----------------------------------------------------------------------------------------|--|--|--------------------------------------------------------------|
| At4g07580 | 4395kb | transposable element gene; pseudogene, Ulp1 protease family                             |  |  |                                                              |
| At4g07583 | 4398kb | transposable element gene; pseudogene, hypothetical protein                             |  |  | SAIL_1266_E05.v2                                             |
| At4g07586 | 4405kb | Transposable element gene; pseudogene, hypothetical protein                             |  |  |                                                              |
| At4g07590 | 4407kb | transposable element gene; gypsy-like retrotransposon family                            |  |  |                                                              |
| At4g07595 | 4408kb | transposable element gene; pseudogene, hypothetical protein                             |  |  |                                                              |
| At4g07600 | 4412kb | transposable element gene; gypsy-like retrotransposon family (Athila)                   |  |  |                                                              |
| At4g07605 | 4416kb | Transposable element gene; pseudogene, hypothetical protein                             |  |  | SALK_111568.54.2<br>5.x                                      |
| At4g07620 | 4420kb | transposable element gene; gypsy-like retrotransposon family (Athila)                   |  |  | SALK_104494.37.1<br>5.x<br>SALK_104477.19.2<br>0.x<br>3 more |
| At4g07630 | 4424kb | transposable element gene; pseudogene, hypothetical protein                             |  |  | SALK_015003.52.0<br>5.x<br>SALK_037396                       |
| At4g07640 | 4428kb | Transposable element gene; gypsy-like retrotransposon family (Athila)                   |  |  | SALK_015203.56.0<br>0.x<br>SALK_015203                       |
| At4g07650 | 4435kb | Transposable element gene; pseudogene, hypothetical protein                             |  |  |                                                              |
| At4g07660 | 4439kb | transposable element gene; gypsy-like retrotransposon family (Athila)                   |  |  | SALK_151280.23.3<br>0.x<br>GK-078C03-<br>016176<br>5 more    |
| At4g07662 | 4448kb | transposable element gene; pseudogene, helicase - related, similar to putative helicase |  |  |                                                              |

|           |        |                                                                        |  |           |                                                      |
|-----------|--------|------------------------------------------------------------------------|--|-----------|------------------------------------------------------|
| At4g07664 | 4454kb | transposable element gene; gypsy-like retrotransposon family (Athila)  |  |           | GK-241H01-014367<br>GK-433F04-018151<br>2 more       |
| At4g07666 | 4458kb | unknown protein                                                        |  |           | SALK_150530.34.10.n                                  |
| At4g07668 | 4462kb | transposable element gene; gypsy-like retrotransposon family           |  |           | SALK_102493.50.85.x<br>SALK_062200.37.80.x<br>4 more |
| At4g07670 | 4464kb | protease-associated (PA) domain-containing protein                     |  |           | SAIL_208_G01.v1                                      |
| At4g07675 | 4467kb | unknown protein                                                        |  | AYAWY16TF | SALK_112044.44.00.x<br>SALK_111948.45.90.x<br>2 more |
| At4g07680 | 4470kb | Transposable element gene; pseudogene, Ulp1 protease famiy             |  |           | SAIL_813_A07.v1                                      |
| At4g07685 | 4472kb | transposable element gene; pseudogene, hypothetical protein            |  |           |                                                      |
| At4g07686 | 4474kb | transposable element gene; pseudogene, hypothetical protein            |  |           |                                                      |
| At4g07688 | 4475kb | Transposable element gene; CACTA-like transposase family (Ptta/En/Spm) |  |           |                                                      |
| At4g07690 | 4477kb | Transposable element gene; similar to unknown protein                  |  |           | FLAG_431D08                                          |
| At4g07693 | 4479kb | Transposable element gene; Mutator-like transposase family             |  |           |                                                      |
| At4g07696 | 4483kb | transposable element gene; pseudogene, hypothetical protein            |  |           |                                                      |
| At4g07699 | 4485kb | pseudogene of zinc knuckle (CCHC-type) family protein                  |  |           |                                                      |
| At4g07700 | 4486kb | Transposable element gene; gypsy-like retrotransposon family (Athila)  |  |           | SALK_129316.21.60.n<br>WiscDsLox393-396H24<br>1 more |

|           |        |                                                                        |  |           |                                                           |
|-----------|--------|------------------------------------------------------------------------|--|-----------|-----------------------------------------------------------|
| At4g07703 | 4491kb | Transposable element gene; gypsy-like retrotransposon family (Athila)  |  |           |                                                           |
| At4g07706 | 4496kb | transposable element gene; CACTA-like transposase family (En/Spm)      |  |           | SAIL_798_B01.v1                                           |
| At4g07713 | 4499kb | transposable element gene; Mutator-like transposase family             |  |           |                                                           |
| At4g07720 | 4505kb | <b>pseudogene</b> , hypothetical protein                               |  |           | SALK_087497.51.9<br>5.x                                   |
| At4g07725 | 4511kb | Transposable element gene; gypsy-like retrotransposon family           |  |           | SALK_061828<br>SALK_061828.45.6<br>5.x<br>1 more          |
| At4g07730 | 4516kb | transposable element gene; gypsy-like retrotransposon family (Athila)  |  |           | GK-269B10-<br>015062                                      |
| At4g07733 | 4522kb | transposable element gene; gypsy-like retrotransposon family (Athila)  |  |           |                                                           |
| At4g07736 | 4528kb | transposable element gene; gypsy-like retrotransposon family (Athila)  |  |           |                                                           |
| At4g07738 | 4534kb | Transposable element gene; gypsy-like retrotransposon family (Athila)  |  |           | GK-339E05-<br>016160<br>SALK_018673.55.2<br>5.x           |
| At4g07740 | 4540kb | Protein of unknown function (DUF3287)                                  |  | AYALW80TR |                                                           |
| At4g07742 | 4542kb | Transposable element gene; gypsy-like retrotransposon family           |  | AYALW80TF | SALK_146485.56.0<br>0.x                                   |
| At4g07744 | 4546kb | transposable element gene; gypsy-like retrotransposon family           |  |           | SALK_117101.46.0<br>0.x<br>SALK_117099.31.2<br>5.n        |
| At4g07747 | 4548kb | <b>pseudogene</b> , hypothetical protein                               |  | AYAIO63TR |                                                           |
| At4g07750 | 4553kb | Transposable element gene; CACTA-like transposase family (Tnp2/En/Spm) |  |           | FLAG_494H08<br>SALK_009814.12.4<br>5.x<br>3 more          |
| At4g07755 | 4563kb | transposable element gene; gypsy-like retrotransposon family (Athila)  |  |           | GK-157D07-<br>013213<br>SALK_044319.51.5<br>5.x<br>4 more |

|           |        |                                                                                                                  |                                         |                                          |                                                       |
|-----------|--------|------------------------------------------------------------------------------------------------------------------|-----------------------------------------|------------------------------------------|-------------------------------------------------------|
| At4g07760 | 4570kb | transposable element gene; CACTA-like transposase family (Tnp1/En/Spm)                                           |                                         |                                          |                                                       |
| At4g07770 | 4594kb | transposable element gene; non-LTR retrotransposon family (LINE)                                                 |                                         |                                          | WiscDsLox433A1                                        |
| At4g07780 | 4601kb | transposable element gene; gypsy-like retrotransposon family (Athila)                                            |                                         |                                          | WiscDsLox288H07<br>SALK_022004.56.0<br>0.x<br>1 more  |
| At4g07786 | 4605kb | This gene encodes a small protein and has either evidence of transcription or purifying selection                |                                         |                                          |                                                       |
| At4g07790 | 4608kb | transposable element gene; hypothetical protein                                                                  |                                         |                                          |                                                       |
| At4g07795 | 4612kb | transposable element gene; <b>pseudogene</b> , replication protein A1                                            |                                         |                                          | GK-872E03-026119<br>GK-872E03-026084                  |
| At4g07800 | 4616kb | transposable element gene; similar to unknown protein                                                            |                                         |                                          |                                                       |
| At4g07803 | 4619kb | transposable element gene; pseudogene, helicase - related, similar to putative helicase                          |                                         |                                          | SALK_079650.53.1<br>0.x<br>SALK_079652.54.0<br>5.x    |
| At4g07806 | 4626kb | Transposable element gene; copia-like retrotransposon family                                                     |                                         |                                          | GK-685E04-024533                                      |
| At4g07810 | 4631kb | transposable element gene; copia-like retrotransposon family                                                     |                                         |                                          | SALK_136928.39.3<br>0.x<br>GK-053A05-012481<br>4 more |
| At4g07812 | 4635kb | unknown pseudogene                                                                                               |                                         |                                          |                                                       |
| At4g07820 | 4637kb | <b>CAP (Cysteine-rich secretory proteins, Antigen 5, and Pathogenesis-related 1 protein) superfamily protein</b> | S63135<br>U63135                        | 178B9T7<br>EBENXNS01DHOID                | FLAG_440H03<br>SAIL_902_D06.v1<br>3 more              |
| At4g07825 | 4644kb | <b>unknown protein</b>                                                                                           | RAFL16-71-016<br>GSLTLS24ZB04<br>8 more | RAFL16-71-016 (5')<br>RAFL16-71-016 (3') | GK-502C01-019715<br>GK-185F09-013650<br>6 more        |
| At4g07830 | 4647kb | transposable element gene; gypsy-like retrotransposon family                                                     |                                         |                                          | SAIL_323_F10.v1                                       |

|           |        |                                                                                                                                                                |          |                        |                                                              |
|-----------|--------|----------------------------------------------------------------------------------------------------------------------------------------------------------------|----------|------------------------|--------------------------------------------------------------|
| At4g07840 | 4654kb | Transposable element gene; copia-like retrotransposon family                                                                                                   | AY299292 |                        | SALK_018389.56.0<br>0.x<br>SALK_141819.24.9<br>5.x           |
| At4g07841 | 4661kb | <b>Pseudogene</b> of AT1G24440; protein binding / zinc ion binding protein                                                                                     |          |                        |                                                              |
| At4g0743  | 4666kb | Transposable element gene; hAT-like transposase family (hobo/Ac/Tam3)                                                                                          |          |                        |                                                              |
| At4g0746  | 4670kb | transposable element gene; gypsy-like retrotransposon family                                                                                                   |          |                        |                                                              |
| At4g07850 | 4673kb | transposable element gene; gypsy-like retrotransposon family                                                                                                   | BT011813 | AYAVM63TR<br>AYAVM63TF | GK-042G09-<br>011515<br>SALK_084701.36.6<br>5.x              |
| At4g07856 | 4681kb | transposable element gene; gypsy-like retrotransposon family                                                                                                   |          |                        | SALK_044669.17.3<br>5.x<br>WiscDsLox317H05                   |
| At4g07862 | 4688kb | transposable element gene; copia-like retrotransposon family                                                                                                   |          |                        | SALK_011297.43.5<br>0.x                                      |
| At4g07868 | 4692kb | <b>unknown protein</b>                                                                                                                                         | AY735639 | AYALX06TR<br>AYALW93TF | GK-301F06-<br>015558                                         |
| At4g07869 | 4693kb | <b>Pseudogene</b> of AT1G24440; protein binding / zinc ion binding protein                                                                                     |          |                        |                                                              |
| At4g07874 | 4698kb | transposable element gene; hAT-like transposase family (hobo/Ac/Tam3)                                                                                          |          |                        | SALK_104937.41.2<br>5.x<br>SALK_104938.51.8<br>0.x<br>3 more |
| At4g07890 | 4705kb | transposable element gene; gypsy-like retrotransposon family (Athila)                                                                                          |          |                        | SALK_090624.47.2<br>0.x                                      |
| At4g07893 | 4707kb | transposable element gene; pseudogene, hypothetical protein, similar to contains similarity to Arabidopsis thaliana hypothetical protein (GB:AC004483)         |          |                        | SALK_024257.30.6<br>5.x<br>SALK_129300.24.3<br>0.n<br>3 more |
| At4g07896 | 4709kb | Transposable element gene; <b>pseudogene</b> , hypothetical protein, similar to contains similarity to Arabidopsis thaliana hypothetical protein (GB:AC004483) |          |                        | SALK_152925.36.2<br>0.x<br>GK-820E02-<br>025640<br>1 more    |

|           |        |                                                                        |  |           |                                                              |
|-----------|--------|------------------------------------------------------------------------|--|-----------|--------------------------------------------------------------|
| At4g07915 | 4718kb | Transposable element gene; non-LTR retrotransposon family (LINE)       |  |           | SALK_066772<br>SALK_066772.51.7<br>5.x<br>2 more             |
| At4g07917 | 4722kb | Transposable element gene; gypsy-like retrotransposon family           |  |           |                                                              |
| At4g07920 | 4725kb | Transposable element gene; pseudogene, hypothetical protein            |  |           | GK-640B04-022275<br>SALK_046111.54.2<br>5.x                  |
| At4g07931 | 4729kb | transposable element gene; gypsy-like retrotransposon family           |  |           | SALK_135546.26.4<br>0.x<br>SALK_135547.48.1<br>5.x<br>1 more |
| At4g07932 | 4733kb | unknown protein                                                        |  | AYAXX31TR | GK-888E05-030256<br>SAIL_174_G07.v1                          |
| At4g07933 | 4735kb | transposable element gene; gypsy-like retrotransposon family           |  |           |                                                              |
| At4g07934 | 4740kb | Transposable element gene; gypsy-like retrotransposon family (Athila)  |  |           |                                                              |
| At4g07935 | 4746kb | transposable element gene; gypsy-like retrotransposon family           |  |           | SALK_141832.40.6<br>0.x<br>SALK_104300.41.5<br>5.x<br>9 more |
| At4g07946 | 4751kb | transposable element gene; CACTA-like transposase family (Ptta/En/Spm) |  |           |                                                              |
| At4g07947 | 4754kb | Transposable element gene; pseudogene, hypothetical protein            |  |           | SALK_147424.42.4<br>0.x<br>SALK_147432.38.7<br>0.x<br>6 more |
| At4g07936 | 4757kb | transposable element gene; pseudogene, hypothetical protein            |  |           | SALK_065597<br>SALK_129254.44.4<br>5.x<br>5 more             |



|           |        |                                                                                                                                                        |                         |                                                  |                                                       |
|-----------|--------|--------------------------------------------------------------------------------------------------------------------------------------------------------|-------------------------|--------------------------------------------------|-------------------------------------------------------|
| At4g07937 | 4760kb | transposable element gene; gypsy-like retrotransposon family (Athila)                                                                                  |                         |                                                  | SALK_126523.34.4<br>5.x<br>GK-209E09-014556<br>1 more |
| At4g07938 | 4766kb | Transposable element gene; gypsy-like retrotransposon family (Athila)                                                                                  |                         |                                                  | GK-110F06-030270<br>GK-438C03-018206<br>1 more        |
| At4g07939 | 4769kb | Transposable element gene; pseudogene, hypothetical protein, similar to contains similarity to Arabidopsis thaliana hypothetical protein (GB:AC004483) |                         |                                                  | SALK_059927.51.0<br>5.x                               |
| At4g07941 | 4772kb | transposable element gene; gypsy-like retrotransposon family (Athila)                                                                                  |                         |                                                  |                                                       |
| At4g07942 | 4775kb | transposable element gene; pseudogene, hypothetical protein, similar to Athila retroelement ORF2, putative                                             |                         |                                                  |                                                       |
| At4g07943 | 4784kb | Transposable element gene; similar to unknown protein                                                                                                  |                         | AYAZD05TF                                        |                                                       |
| At4g07944 | 4785kb | Transposable element gene; similar to unknown protein                                                                                                  |                         | AYALX20TF                                        |                                                       |
| At4g07945 | 4789kb | transposable element gene; pseudogene, similar to putative reverse transcriptase, similar to reverse transcriptase, putative                           |                         |                                                  |                                                       |
| At4g07940 | 4793kb | Protein of unknown function (DUF3245)                                                                                                                  |                         |                                                  | SALK_091810.49.0<br>0.x<br>FLAG_347D05<br>7 more      |
| At4g07950 | 4799kb | DNA-directed RNA polymerase, subunit M, archaeal                                                                                                       | RAFL09-96-C05<br>U25511 | 17D02<br>701495736                               | GK-412F10-018001<br>SAIL_823_B06.v3<br>4 more         |
| At4g07960 | 4804kb | encodes a gene similar to cellulose synthase                                                                                                           | RAFL19-71-L23<br>U60875 | RAFL19-32-H22 (3')<br>600037971R1 (5')<br>3 more | SAIL_168_F02<br>SALK_096810<br>9 more                 |
| At4g07965 | 4809kb | unknown protein                                                                                                                                        |                         | AYALX36TF                                        | FLAG_526B04<br>SALK_137099.18.2<br>0.x<br>1 more      |

|           |         |                                                                                               |                                          |                                            |                                                              |
|-----------|---------|-----------------------------------------------------------------------------------------------|------------------------------------------|--------------------------------------------|--------------------------------------------------------------|
| At4g07967 | 4813kb  | transposable element gene; pseudogene, hypothetical protein                                   |                                          |                                            | SALK_001679.55.5<br>0.x<br>SAIL_878_H09<br>8 more            |
| At4g07970 | 4818 kb | Transposable element gene; hypothetical protein, similar to A. thaliana hypothetical proteins |                                          |                                            | SALK_040916.28.2<br>0.n                                      |
| At4g07990 | 4828kb  | Chaperone DnaJ-domain superfamily protein                                                     | R11662<br>U11662                         | RAFL19-33-G09 (3')<br>02L02 (3')<br>2 more | SALK_018033<br>SALK_086123.38.8<br>0.n<br>4 more             |
| At4g08000 | 4832kb  | Transposable element gene; CACTA-like transposase family (Tnp2/En/Spm)                        |                                          |                                            | FLAG_163C11                                                  |
| At4g08010 | 4834kb  | Transposable element gene; CACTA-like transposase family (En/Spm)                             |                                          |                                            | WiscDsLox457-460K5                                           |
| At4g08013 | 4836kb  | transposable element gene; similar to unknown protein                                         |                                          | AYALX44TF                                  |                                                              |
| At4g08016 | 4838kb  | transposable element gene; CACTA-like transposase family (Ptta/En/Spm)                        |                                          | AYALX44TF<br>AYALX40TR                     |                                                              |
| At4g08020 | 4840kb  | transposable element gene; CACTA-like transposase family (En/Spm)                             |                                          |                                            | FLAG_249C11<br>FLAG_249C10                                   |
| At4g08022 | 4845kb  | pseudogene, hypothetical protein                                                              |                                          | 062174_1642_3264<br>083931_1338_0700       |                                                              |
| At4g08025 | 4847kb  | Protein of unknown function (DUF784)                                                          |                                          | AYBID02TR                                  | SALK_149463.45.2<br>5.x<br>SALK_044554.42.5<br>5.x           |
| At4g08028 | 4852kb  | Encodes a defensin-like (DEFL) family protein.                                                |                                          |                                            |                                                              |
| At4g08030 | 4856kb  | transposable element gene; gypsy-like retrotransposon family (Athila)                         |                                          |                                            |                                                              |
|           | 4861kb  | bp3 north breakpoint                                                                          |                                          |                                            |                                                              |
| At4g08032 | 4864kb  | transposable element gene; pseudogene, similar to putative transposable element               |                                          |                                            | GK-228E05-014267                                             |
| At4g08035 | 4867kb  | Unknown gene                                                                                  | GSLTSIL37ZE05<br>RAFL25-48-G05<br>3 more | RAFL25-48-G05 (5')<br>701554386<br>3 more  | SALK_019771.39.9<br>5.x<br>SALK_066519.56.0<br>0.x<br>5 more |

|           |        |                                                                                                                                                   |            |      |                                                      |
|-----------|--------|---------------------------------------------------------------------------------------------------------------------------------------------------|------------|------|------------------------------------------------------|
| At4g08033 | 4877kb | transposable element gene; pseudogene, hypothetical protein                                                                                       |            |      | GK-623G04-022313<br>GK-634B04-022366<br>2 more       |
| At4g08034 | 4879kb | transposable element gene; pseudogene, similar to putative non-LTR retroelement reverse transcriptase, similar to reverse transcriptase, putative |            |      |                                                      |
| At4g08036 | 4880kb | transposable element gene; non-LTR retrotransposon family (LINE)                                                                                  |            |      |                                                      |
| At4g08038 | 4881kb | Transposable element gene; pseudogene, hypothetical protein, similar to reverse transcriptase, putative                                           |            |      |                                                      |
| At4g08039 | 4885kb | Encodes a defensin-like (DEFL) family protein.                                                                                                    |            |      | GK-444E12-024528<br>GK-444F12-024528<br>2 more       |
| At4g08040 | 4888kb | Encodes an aminotransferase that belongs to ACC synthase gene family structurally                                                                 | C00055 (E) |      | GK-284B12-015276<br>GK-284B12-015289<br>1 more       |
| At4g08050 | 4899kb | transposable element gene; gypsy-like retrotransposon family (Athila)                                                                             |            |      | SALK_073847.50.7<br>5.x<br>SALK_151095.51.0<br>5.x   |
| At4g08053 | 4913kb | transposable element gene; CACTA-like transposase family (En/Spm)                                                                                 |            |      |                                                      |
| At4g08054 | 4918kb | transposable element gene; copia-like retrotransposon family                                                                                      |            |      | SALK_059626.19.8<br>5.x                              |
| At4g08056 | 4922kb | transposable element gene; similar to unknown protein                                                                                             |            |      |                                                      |
| At4g08060 | 4927kb | transposable element gene; CACTA-like transposase family (Tnp1/En/Spm)                                                                            |            | PI32 | SALK_018653.36.7<br>5.x<br>SAIL_900_C11.v2<br>2 more |
| At4g08070 | 4930kb | Transposable element gene; CACTA-like transposase family (Tnp2/En/Spm)                                                                            |            |      | GK-447A03-024539<br>GK-447A03-024530<br>3 more       |
| At4g08071 | 4934kb | pseudogene, hypothetical protein                                                                                                                  |            |      |                                                      |

|           |        |                                                                                                    |  |                                  |                                                              |
|-----------|--------|----------------------------------------------------------------------------------------------------|--|----------------------------------|--------------------------------------------------------------|
| At4g08072 | 4946kb | transposable element gene; gypsy-like retrotransposon family (Athila)                              |  |                                  |                                                              |
| At4g08073 | 4950kb | This gene encodes a small protein and has either evidence of transcription or purifying selection. |  |                                  |                                                              |
| At4g08074 | 4950kb | Transposable element gene; gypsy-like retrotransposon family                                       |  |                                  |                                                              |
| At4g08076 | 4953kb | transposable element gene; gypsy-like retrotransposon family (Athila)                              |  |                                  |                                                              |
| At4g08078 | 4962kb | transposable element gene; gypsy-like retrotransposon family (Athila)                              |  |                                  | SALK_110250.18.8<br>5.n<br>SAIL_1187_H11.v1<br>1 more        |
| At4g08080 | 4965kb | transposable element gene; gypsy-like retrotransposon family (Athila)                              |  |                                  | SALK_024043.35.2<br>0.x<br>SALK_079126.42.9<br>5.x<br>1 more |
| At4g08090 | 4974kb | transposable element gene; CACTA-like transposase family (Ptta/En/Spm)                             |  |                                  | GK-272C05-015096<br>GK-854A10-025755<br>8 more               |
| At4g08091 | 4982kb | transposable element gene; CACTA-like transposase family (Ptta/En/Spm)                             |  | AYARA33TR<br>AYALX59TF<br>1 more | SALK_073643.24.4<br>5.x                                      |
| At4g08092 | 4987kb | transposable element gene; CACTA-like transposase family (Tnp2/En/Spm)                             |  |                                  | SALK_048617.52.3<br>5.x<br>SAIL_1221_A08.v1                  |
| At4g08093 | 4991kb | pseudogene of unknown protein                                                                      |  | M20D2 (5')<br>271717 (5')        | SALK_026461.35.4<br>0.x                                      |
| At4g08094 | 4994kb | Transposable element gene; copia-like retrotransposon family                                       |  |                                  | SALK_031378.49.7<br>5.x<br>SALK_143010.41.5<br>5.x           |
| At4g08095 | 5000kb | transposable element gene; gypsy-like retrotransposon family                                       |  |                                  | SALK_074931.41.8<br>5.x<br>SALK_125636.40.6<br>5.x           |
| At4g08096 | 5002kb | Transposable element gene; gypsy-like retrotransposon family                                       |  |                                  |                                                              |
| At4g08097 | 5005kb | BEST Arabidopsis thaliana protein match is: myosin heavy chain-related (TAIR:AT3G30230.1)          |  |                                  |                                                              |
| At4g08098 | 5007kb | pseudogene of hypothetical protein                                                                 |  |                                  |                                                              |

|           |         |                                                                       |               |  |                                                  |
|-----------|---------|-----------------------------------------------------------------------|---------------|--|--------------------------------------------------|
| At4g08099 | 5010kb  | transposable element gene; gypsy-like retrotransposon family          |               |  | GK-137F04-012753<br>GK-137F04-012802<br>1 more   |
| At4g08101 | 5013kb  | Transposable element gene; gypsy-like retrotransposon family (Athila) |               |  | WiscDsLox367D1_010<br>GK-138E10-012752<br>2 more |
| At4g08102 | 5016kb  | Transposable element gene; gypsy-like retrotransposon family          |               |  |                                                  |
| At4g08103 | 5019kb  | Transposable element gene; gypsy-like retrotransposon family (Athila) |               |  | SALK_125533.42.60.x                              |
| At4g08116 | 5020kb  | Encodes a microRNA                                                    |               |  |                                                  |
| At4g08104 | 5022kb  | transposable element gene; gypsy-like retrotransposon family (Athila) |               |  | SALK_091129.54.50.x                              |
| At4g08105 | 5025kb  | Transposable element gene; gypsy-like retrotransposon family          | RAFL22-59-121 |  |                                                  |
| At4g08106 | 5028kb  | transposable element gene; gypsy-like retrotransposon family (Athila) | RAFL22-59-121 |  |                                                  |
| At4g08107 | 5032 kb | Transposable element gene; gypsy-like retrotransposon family          |               |  |                                                  |
| At4g08108 | 5042 kb | transposable element gene; copia-like retrotransposon family          |               |  | GK-333E06-016060<br>GK-018A02-013490<br>1 more   |
| At4g08109 | 5052kb  | Transposable element gene; gypsy-like retrotransposon family (Athila) |               |  | SAIL_326_C03.v1<br>SAIL_326b_C03.v1<br>3 more    |
| At4g08111 | 5056kb  | transposable element gene; similar to unknown protein                 |               |  | SALK_020553.54.50.x                              |
| At4g08112 | 5062kb  | Transposable element gene; gypsy-like retrotransposon family (Athila) |               |  | GK-605F11-021294<br>GK-605F11-021275<br>1 more   |
| At4g08113 | 5066kb  | transposable element gene; similar to unknown protein                 |               |  | GK-389A09-017791<br>GK-389A09-018261             |

|           |        |                                                                        |                                         |                                        |                                                       |
|-----------|--------|------------------------------------------------------------------------|-----------------------------------------|----------------------------------------|-------------------------------------------------------|
| At4g08114 | 5071kb | transposable element gene; gypsy-like retrotransposon family           |                                         |                                        | FLAG_387C08<br>GK-476E06-019131<br>1 more             |
| At4g08115 | 5077kb | Transposable element gene; gypsy-like retrotransposon family           |                                         | AYBCC39TF<br>APZL23H09F (3')<br>1 more | SALK_093738<br>SALK_103945.23.1<br>5.x<br>4 more      |
| At4g08100 | 5082kb | transposable element gene; gypsy-like retrotransposon family           |                                         |                                        | SALK_146037.37.7<br>5.x<br>SAIL_1293_A10.v1<br>4 more |
| At4g08110 | 5085kb | transposable element gene; CACTA-like transposase family (Ptta/En/Spm) | RAFL16-08-P11<br>GSLTLS87ZB03<br>3 more | RAFL16-08-P11 (3')<br>FAFM91<br>2 more | SALK_129167.17.9<br>5.x<br>GK-903B01-030004<br>6 more |
| At4g08120 | 5091kb | transposable element gene; CACTA-like transposase family (Tnp1/En/Spm) |                                         |                                        | SALK_043486.38.4<br>5.x<br>GK-872E07-026084<br>1 more |
| At4g08130 | 5094kb | transposable element gene; similar to unknown protein                  |                                         |                                        |                                                       |
|           | 5101kb | bp5 north breakpoint                                                   |                                         |                                        |                                                       |
| At4g08131 | 5104kb | transposable element gene; gypsy-like retrotransposon family (Athila)  |                                         |                                        | GK-004D03-014797<br>FLAG_415F10                       |
| At4g08132 | 5107kb | transposable element gene; gypsy-like retrotransposon family (Athila)  |                                         |                                        | GK-544F05-020964<br>FLAG_589F03<br>2 more             |
| At4g08134 | 5117kb | transposable element gene; gypsy-like retrotransposon family           |                                         |                                        | GK-079H05-011917<br>GK-708C09-022874<br>5 more        |
| At4g08135 | 5120kb | Transposable element gene; gypsy-like retrotransposon family (Athila)  |                                         |                                        | GK-270H02-015063<br>SALK_071610.56.0<br>0.x<br>3 more |

|           |               |                                                                                                                      |                                          |                                                    |                                                                     |
|-----------|---------------|----------------------------------------------------------------------------------------------------------------------|------------------------------------------|----------------------------------------------------|---------------------------------------------------------------------|
| At4g08136 | 5124kb        | purple acid phosphatase. putative, similar to purple acid phosphatase (GI:20257485)                                  |                                          |                                                    | GK-440E11-018208<br>GK-438E11-018206<br>1 more                      |
| At4g08138 | 5131kb        | transposable element gene; gypsy-like retrotransposon family                                                         |                                          |                                                    | GK-335B02-016062<br>GK-151A11-013138<br>4 more                      |
| At4g08140 | 5136kb        | BEST Arabidopsis thaliana protein match is: 26S proteasome regulatory subunit S2 1A (TAIR:AT2G20580.1)               |                                          |                                                    | AY202294<br>AY027345<br>3 more                                      |
| At4g08145 | 5139kb        | transposable element gene; hypothetical protein, contains Pfam domain, PF04827: Protein of unknown function (DUF635) |                                          |                                                    | SAIL_1245_C08.v1                                                    |
| At4g08150 | 5149kb        | <b>BREVIPEDICELLUS</b> : A member of class I knotted1-like homeobox gene family (together with KNAT2)                | R10690<br>U10690<br>2 more               | EB3RODY02GUHBF<br>EB3RODY01CBBQK<br>2 more         | SALK_137958.48.3<br>0.x<br>SAIL_119_C02<br>1 more                   |
| At4g08151 | 5152kb        | This gene encodes a small protein and has either evidence of transcription or purifying selection                    |                                          |                                                    |                                                                     |
| At4g08160 | 5161kb        | Encodes a putative glycosyl hydrolase family 10 protein (xylanase)                                                   | RAFL16-91-G20<br>GSLTPGH76ZB12<br>2 more | RAFL16-91-G20 (3')<br>RAFL16-91-G20 (5')           | GK-692G06-025071<br>SAIL_1290_G04<br>4 more                         |
|           | <b>5164kb</b> | <b>bp2 south breakpoint</b>                                                                                          |                                          |                                                    |                                                                     |
| At4g08170 | 5165kb        | <b>Inositol 1,3,4-trisphosphate 5/6-kinase family protein</b>                                                        | GSLTPGH47ZH05<br>R13178<br>4 more        | RAFL07-60-109 (3')<br>E11A5T7<br>4 more            | ET7116.Ds5.03.28.01.JU61.b.361<br>SALK_120653.40.8<br>0.x<br>6 more |
| At4g08176 | 5168kb        | This gene encodes a small protein and has either evidence of transcription or purifying selection.                   |                                          |                                                    | SALK_021382.43.4<br>5.x<br>FLAG_267D07                              |
| At4g08180 | 5171kb        | <b>OSBP(oxysterol binding protein)-related protein 1C (ORP1C)</b>                                                    | R22195<br>GSLTFB25ZC08<br>3 more         | RAFL07-18-E16 (5')<br>RAFL23-07-B20 (5')<br>8 more | SALK_089877.20.0<br>5.x<br>SALK_040837<br>4 more                    |

|           |        |                                                                                                                                  |                                          |                                              |                                                              |
|-----------|--------|----------------------------------------------------------------------------------------------------------------------------------|------------------------------------------|----------------------------------------------|--------------------------------------------------------------|
| At4g08190 | 5175kb | P-loop containing nucleoside triphosphate hydrolases superfamily protein                                                         |                                          |                                              | SALK_019066.31.0<br>0.x                                      |
| At4g08200 | 5182kb | Transposable element gene; similar to unknown protein                                                                            |                                          |                                              | GK-157D07-013241                                             |
| At4g08210 | 5185kb | Pentatricopeptide repeat (PPR-like) superfamily protein                                                                          |                                          | 160195_0420_1813                             | SAIL_90_H03.v1                                               |
| At4g08220 | 5187kb | transposable element gene; Mutator-like transposase family                                                                       |                                          | MPIZP2001G133Q (5-PRIME)<br>171747_2172_1710 | SALK_049189.50.9<br>0.x<br>GK-299F09-015556<br>7 more        |
| At4g08230 | 5189kb | glycine-rich protein                                                                                                             | GSLTSIL53ZD10<br>RAFL09-43-M03<br>1 more | RAFL21-95-G10 (5')                           | SALK_021428.51.4<br>5.n<br>SALK_013775<br>10 more            |
| At4g08240 | 5196kb | unknown protein                                                                                                                  | RAFL21-47-N24<br>GSLTSIL36ZE09<br>2 more | EBENXNS02IXFOZ<br>EBENXNS01DDT7D             | SALK_010682.53.7<br>5.x<br>WiscDsLox289_29<br>2M12<br>1 more |
| At4g08250 | 5197kb | GRAS family transcription factor                                                                                                 | BT011797                                 | 044663_3632_2523<br>EB3RODY01BLU4B<br>2 more | CT955475<br>CT955474<br>2 more                               |
| At4g08260 | 5201kb | Protein phosphatase 2C family protein                                                                                            |                                          |                                              |                                                              |
|           | 5203kb | bp1 south breakpoint                                                                                                             |                                          |                                              |                                                              |
| At4g08262 | 5207kb | Transposable element gene; non-LTR retrotransposon family (LINE)                                                                 |                                          |                                              | SAIL_1258_A09.v1<br>SALK_101212<br>8 more                    |
|           | 5212kb | bp11 south breakpoint                                                                                                            |                                          |                                              |                                                              |
| At4g08263 | 5212kb | BEST Arabidopsis thaliana protein match is: DNA-binding storekeeper protein-related transcriptional regulator (TAIR:AT4G00610.1) |                                          |                                              | GK-646B03-023221<br>GK-563F06-022810<br>1 more               |
| At4g08264 | 5215kb | transposable element gene; pseudogene, similar to putative transposable element, similar to transposase, putative                |                                          |                                              | SALK_144748.52.2<br>5.x<br>SALK_017228.55.5<br>0.x           |



|           |        |                                                                                 |                                         |                                                |                                                              |
|-----------|--------|---------------------------------------------------------------------------------|-----------------------------------------|------------------------------------------------|--------------------------------------------------------------|
|           |        |                                                                                 |                                         |                                                | 7 more                                                       |
| At4g08267 | 5217kb | hAT transposon superfamily protein                                              |                                         |                                                | SALK_132411.37.8<br>5.x                                      |
| At4g08270 | 5218kb | BEST Arabidopsis thaliana protein match is: DNA binding (TAIR:AT3G47680.1)      |                                         |                                                |                                                              |
| At4g08275 | 5223kb | Transposable element gene; gypsy-like retrotransposon family (Athila)           |                                         |                                                |                                                              |
| At4g08280 | 5231kb | Thioredoxin superfamily protein                                                 | R12554<br>U12554                        | EB3RODY01A7BRW<br>EB3RODY02JJPL7<br>1 more     | SALK_046593.53.1<br>5.x<br>SALK_076766.50.0<br>0.x<br>3 more |
| At4g08290 | 5240kb | nodulin MtN21 /EamA-like transporter family protein                             | RAFL19-85-H13<br>GSLTLS26ZA04<br>2 more | RAFL19-85-H13 (5')<br>701500489<br>2 more      | SALK_076704.39.8<br>5.x<br>SAIL_448_D06.v1<br>5 more         |
|           | 5242kb | bp5 south breakpoint                                                            |                                         |                                                |                                                              |
| At4g08300 | 5246kb | nodulin MtN21 /EamA-like transporter family protein                             | RAFL16-91-H07<br>GSLTFB90ZD06<br>1 more | RAFL16-91-H07 (5')<br>EBENXNS02G6CXN<br>3 more | SAIL_686_A11.v1                                              |
|           | 5248kb | bp3 south breakpoint                                                            |                                         |                                                |                                                              |
| At4g08310 | 5250kb | BEST Arabidopsis thaliana protein match is: unknown protein (TAIR:AT1G44780.2)* | R09713<br>U09713<br>1 more              | RAFL21-11-010 (3')<br>EB3RODY01AW271<br>5 more | GK-413F08-<br>017998<br>FLAG_376F07<br>7 more                |
