# Supplementary material for: Chromosome Fragile Sites in Arabidopsis Harbor Matrix Attachment Regions That May Be Associated with Ancestral Chromosome Rearrangement Events
Source: PubMed Central journal article supplement (PMC3527283; doi:10.1371/journal.pgen.1003136), 2012-12-20
Supplement: pgen.1003136.s010.pdf [file pgen.1003136.s010.pdf]

Table S6: Primers used to generate southwestern blot probes\*

| Name                        | Sequence                       |
|-----------------------------|--------------------------------|
| PC MAR For                  | TTTGTGTTGTAAGGTGACACTAATGAATTG |
| PC MAR Back                 | GAGTATTGACATGCATTGGTAAGCG      |
| <i>bp-2</i> South For       | GGCAATGATAACCACTAAAATCTCATACC  |
| <i>bp-2</i> South Back      | CTTCCAGAGGCATAGAACTGTAACCTC    |
| <i>bp-3</i> North For       | TCCTGAAGCAAACAATAGAGTAAATCAAG  |
| <i>bp-3</i> North Back      | ACCTAGTAAAACATAGTAGAAGTGGGCG   |
| <i>bp-3</i> South For       | TATCGGTGGAAGAGAAAATAGGAATGC    |
| <i>bp-3</i> South Back      | TTGGTTGCAGAGGATGGTGGTGAAG      |
| <i>bp-5</i> North For       | TGTCGCCGTTGTTAGTGTCTGAG        |
| <i>bp-5</i> North Back      | ACCTTGGTTGCTTGGATGCC           |
| <i>bp-11</i> South For      | CGTTGGATCTCATAGATAGTAGATTATG   |
| <i>bp-11</i> South Back     | TTGATAGATGTGCTTTTAAGTGAGTATCT  |
| Histone H1 (At1g06760) For  | CTTCACAATCCTCATAATCACTTTCG     |
| Histone H1 (At1g06760) Back | GGTAGTCCAAAGGAACTGTGAATAAC     |

\*These primers were used to generate PCR fragments that were subsequently end labeled to produce radiolabelled probes for southwestern blotting.
